# Supplementary material for: Midbrain projection to the basolateral amygdala encodes anxiety-like but not depression-like behaviors
Source: PubMed Central journal article supplement (PMC8940900; doi:10.1038/s41467-022-29155-1), 2022-03-22

## Supplementary Information:

### Figure Legends:

**Supplementary Fig. 1. CSDS induces anxiety-like behaviors independently of social avoidance behaviors. a-g** Supplementary results of C57BL6/J mouse behaviors depicted in main Fig. 1. **a** Time (%) in EPM open arms of CSDS-exposed mice (CSDS n=66 mice: n=39 AD + n=27 A mice) compared to stress-naïve CTL mice (n=28 control) (Mann-Whitney test:  $U=361$   $p=0.001$ ). **b** Time (s) in EPM open arms, closed arms and center in n=28 control, n=39 AD and n=27 A mice (Kruskal-Wallis test, open:  $H_{2/91}=24.61$   $p=0.001$ ;  $Z=4.887$   $p=0.001$ ;  $Z=3.336$   $p=0.003$ ;  $Z=1.241$   $p=0.64$ , closed:  $H_{2/91}=20.44$ ,  $p=0.001$ ;  $Z=1.293$   $p=0.59$ ;  $Z=2.913$   $p=0.01$ ;  $Z=4.479$   $p=0.001$ , center:  $H_{2/91}=1.36$ ,  $p=0.51$ ), and related locomotion and velocity during the EPM test (Kruskal-Wallis test, locomotion:  $H_{2/91}=7.41$   $p=0.051$ , velocity:  $H_{2/91}=0.58$ ,  $p=0.74$ ). **c** Spearman correlation analyses show that the time (%) in open arms does not correlate with the social interaction behaviors of the stress-naïve CTL mice ( $r=0.079$ ,  $p=0.98$ ,  $n=28$ ). **d** Time (%) in OFT center of CSDS-exposed mice (CSDS n=40 mice: n=19 AD and n=21 A mice) compared to stress-naïve CTL mice (n=15 control; Mann-Whitney test:  $U=92.5$ ,  $p=0.001$ ). **e** Social interaction behaviors of mice depicted in main figure 1i-l (Paired t-tests:  $t=2.84$   $p=0.008$ ;  $t=5.06$   $p=6.9e-05$ ;  $t=4.09$   $p=0.0002$ ), blue circles represent mean  $\pm$  s.e.m., and respective social interaction ratio in CTL, AD and A mice (ANOVA,  $F_{2/91}=36.02$   $p=1.54e-10$ ;  $t=6.758$   $p=1.2e-08$ ,  $t=0.35$   $p=0.99$ ;  $t=7.75$   $p=3.3e-10$   $n=15-21$  mice). **f** The time (s) in open field center revealed that both AD and A mice have a decreased time spent in open field center compared to stress-naïve CTL mice (Kruskal-Wallis test,  $H_{2/52}=17.86$ ,  $p=3.17e-06$ ,  $Z=2.64$   $p=0.02$ ;  $Z=4.127$   $p=0.001$ ;  $Z=1.62$   $p=0.31$ , for n=15 CTL, n=19 AD and n=21 A mice), and velocity and locomotion during the OFT show no differences between CTL, AD and A mice (ANOVA, velocity:  $F_{2/52}=0.31$   $p=0.4$ , locomotion:  $F_{2/52}=0.94$   $p=0.32$ ). **g** Spearman correlation analyses show that the time (%) in open field center does not correlate with the social interaction behaviors of CTL mice ( $r=0.16$ ,  $p=0.56$ ,  $n=15$ ). **h** Experimental timeline for a separate cohort of mice. **i** Spearman correlation analyses of the social interaction behavior before (day -7) and after CSDS (day 11) and respective direct comparison analyses in AD (Top right) and A mice (Bottom right; respective

analyses:  $r=-0.023$ ,  $p=0.91$ ,  $n=29$ ; AD mice: paired t-test,  $t=5.87$   $p=0.0001$ ,  $n=19$ ; A mice: paired t-test,  $t=0.76$   $p=0.46$ ,  $n=10$ ). **j** Spearman correlation analyses of the time in open arms before (day -4) and after CSDS (day 14,  $r=0.445$   $p=0.016$ ,  $n=19$ ) and respective direct comparison analyses in AD (Top right,  $t=5.87$   $p=0.0001$ ) and A mice (Bottom right;  $t=2.28$ ,  $p=0.04$ ,  $n=10$ ). **k** Spearman correlation analyses showing that the social interaction behavior after CSDS does not correlate with the social interaction behaviors before CSDS in control mice ( $r=-0.601$ ;  $t=0.77$ ,  $p=0.47$ ,  $n=7$ ). **l** Spearman correlation analyses showing that the time (%) in open arms after CSDS does not correlate with the time (%) in open arms before CSDS in CTL mice ( $r=0.071$ ;  $t=2.07$ ,  $p=0.09$ ,  $n=7$ ). In all panels, data are represented as mean  $\pm$  s.e.m. for  $n$  number of mice; two-sided statistical analyses and post hoc corrected tests were performed, \* $p<0.05$ , \*\* $p<0.01$ , \*\*\* $p<0.001$ .

**Supplementary Fig. 2. CSDS induces anxiety-like behaviors independently of reduced preference for natural rewards.** **a** Experimental timeline for a separate cohort of C57BL6/J mice composed of  $n=23$  CTL,  $n=25$  AD and  $n=21$  A mice, **b** Social interaction ratio (ANOVA,  $F_{2/66}=17.39$   $p<0.0001$ ;  $t=3.42$   $p=0.003$ ;  $t=5.85$   $p<0.0001$ ;  $t=2.26$   $p=0.39$ ), preference for female urine sent over water sent (ANOVA,  $F_{2/66}=4.615$   $p=0.0057$ ;  $t=2.97$   $p=0.012$ ;  $t=2.75$   $p=0.015$ ;  $t=0.14$   $p=0.887$ ), sucrose preference (ANOVA,  $F_{2/66}=5.594$   $p=0.014$ ;  $t=2.01$   $p=0.048$ ;  $t=2.921$   $p=0.009$ ;  $t=0.95$   $p=0.34$ ), percentage of time spent in EPM open arms (ANOVA,  $F_{2/66}=6.830$   $p=0.002$ ;  $t=3.34$   $p=0.004$ ;  $t=3.04$   $p=0.01$ ;  $t=0.16$   $p=0.99$ ), and percentage of time spent in OFT center (ANOVA,  $F_{2/66}=6.607$   $p=0.002$ ;  $t=2.6$   $p=0.034$ ;  $t=3.49$   $p=0.002$ ;  $t=1.02$   $p=0.93$ ). Bars represent mean  $\pm$  s.e.m. **c** Spearman correlation analyses showing that the preference for female urine and sucrose preference correlate with the social interaction behaviors in AD and A mice ( $r=0.55$   $p<0.001$ ,  $r=0.34$ ,  $p=0.02$ ,  $n=46$ ), but not with percentage of time spent in OFT center and percentage of time spent in EPM open arms ( $r=-0.06$   $p=0.65$ ,  $r=-0.07$   $p=0.64$ ,  $n=46$ ). **d** Spearman correlation analyses showing that preference for female urine and sucrose preference do not correlate with the time (%) in EPM open arms in AD and A mice ( $r=-0.11$   $p=0.44$ ,  $r=-0.12$ ,  $p=0.40$ ,  $n=46$ ) while percentage of time spent in OFT center correlates with the time (%) in EPM open arms ( $r=0.39$ ,  $p=0.006$ ,  $n=46$ ). **e** Same as c in stress naïve CTL mice ( $r=0.63$ ,  $p=0.001$ ,  $r=0.49$ ,  $p=0.016$ ,  $r=-0.01$   $p=0.95$ ,  $r=0.19$ ,  $p=0.36$ ,  $n=23$ ). **f** Same as d in

stress naïve CTL mice ( $r=0.19$   $p=0.36$ ,  $r=-0.04$ ,  $p=0.82$ ,  $r=0.43$   $p=0.04$ ,  $n=23$ ). In all panels, data are represented as mean  $\pm$  s.e.m.; two-sided statistical analyses and post hoc corrected tests were performed, \* $p<0.05$ , \*\* $p<0.01$ , \*\*\* $p<0.001$ .

**Supplementary Fig. 3. Circuit-probing and electrophysiological strategies to probe firing rate of retrobead-labeled VTA→BLA putative dopamine neurons and virally labeled VTA→BLA dopamine neurons in CTL, AD and A mice.** **a** Experimental strategy used to label the potent co-projection of VTA neuron to both NAc and BLA, two viral vectors were bilaterally injected: AAVrg-tdTomato vectors in the NAc and AAVrg-eGFP vectors in the BLA of the same mice (scale bar=500 and 100  $\mu\text{m}$ ) in 5 C57BL/6J mice. **b** (Left) Confocal images showing expression of tdTomato in VTA→NAc neurons and eGFP in VTA→BLA neurons; (Center) quantification showing that amongst 2100 labeled neurons only 2.7% neurons were labeled for both eGFP and tdTomato and (Right) number of labeled VTA projecting neurons per projection. This experiment was performed in a VTA circuit-specific manner (empty circle, 5 mice) and in a VTA dopamine cell- and circuit-specific manner using Cre-dependent vectors in 4 TH-BAC-Cre mice (see methods section). **c** Experimental timeline. **d** Schematics of the two retrograde-targeting methods for circuit- and/or cell-specific *ex vivo* electrophysiological recording: (Top) C57bl/6J mice injected with green luma retrobeads and in (Bottom) Th-BAC-Cre mice injected with retrograding AAVrg-DIO-eYFP, and related confocal images showing co-expression of (Top) Th labelling (red) with Luma retrobeads (green) and (Bottom) Th labelling (red) with AAVrg-DIO-eYFP expression (green) in TH-BAC-Cre mice (scale bar, 100  $\mu\text{m}$ ), quantification shows 94% colocalization (2-3 sections per mouse from 4 mice). **e-g** Firing activity is similar in retrobead-labeled VTA→BLA putative dopamine neurons in C57BL6/J mice and virally labeled VTA→BLA dopamine neurons in TH-BAC-Cre mice. **e** Sample traces of VTA→BLA neuron *ex vivo* cell-attached recordings in control mice (scale bar=0.2mV), the average firing rate is not statistically different (t.test,  $t=0.24$ ,  $p=0.81$ ,  $n=16,15$ ). **f** Same as **e** in AD mice (t.test,  $t=0.23$ ,  $p=0.81$ ,  $n=14,32$ ). **g** Same as **e** in A mice (t.test,  $t=1.49$ ,  $p=0.14$ ,  $n=9,21$ ). Bars represent mean  $\pm$  s.e.m. for  $n$ =number of neurons. **h** Spearman correlation analyses of VTA→BLA dopamine neuron firing with the

social interaction behavior and with time (%) in EPM open arms in stress-naïve CTL mice (n=7, p=0.35, p=0.048, 3-7 neurons per mouse, combined C57BL6/J and TH-BAC-Cre mice). **i** Spearman correlation analyses of VTA→BLA dopamine neuron firing activity with the social interaction behavior and with the time in EPM open arms after CSDS (p=0.66, p=0.16, n=16, 3-7 neurons per mouse, combined C57BL6/J and TH-BAC-Cre mice). In all panels, data are represented as mean ± s.e.m.; two-sided statistical analyses and post hoc tests were performed, \*p<0.05.

**Supplementary Fig. 4. VTA→BLA neuronal dynamic does not correlate with social interaction behaviors.** **a** Schematic of the fiber photometry system used, two light-emitting diodes at 490 nm and 405 nm, reflected off dichroic mirrors, coupled into the optical fiber. Two output signals were projected onto a photodetector, after which they were separated for analysis and time locked with the video tracking software system. **b** Social interaction ratio showing no differences in basal social interaction behaviors between stress naïve mice not implanted and stress naïve mice implanted for fiber photometry (Mann Whitney test, U=138 p=0.73, n=15,20) and 3D representation of the z-scored GCaMP6 signal, 405nm signal and mouse velocity upon the mouse position during the social interaction test with social target present. **c** Time (%) in EPM open arms showing no differences in basal anxiety-like behaviors between stress naïve mice not implanted and stress naïve mice implanted for fiber photometry (Mann Whitney test, U=111 p=0.17, n=15,20). **d** Without social target present. (Left) Sample trace (bars represent when the mouse is in the SI zone) and 3D representation of the GCaMP6  $\Delta F/F$  upon the mouse position during the SI test without social target present. (Right) Pearson correlation analyses of mean SI zone VTA→BLA activity as mean  $\Delta F/F$  z-score AUC ( $r^2=0.016$  p=0.56, n=23) and number of events per minute ( $r^2=0.004$  p=0.77, n=23) with the time in SI zone. **e** Same as **d** with social target present (AUC:  $r^2=0.02$  p=0.5; events per minute:  $r^2=0.08$  p=0.18, n=23 stress-naïve C57BL6/J mice). **f** Dynamics of averaged GCaMP6s and GCaMP6f signals and (Bottom) related 405nm signals (z-scores mean ± s.e.m.) 5 s before and 5 s after the mice enter in SI zone without social target present (blue) and with social target present (red) showing that VTA→BLA neuronal activity does not increase when stress naïve mice transit to SI zone, (onset) averaged GCaMP6 and

405 nm signal z-scores within a 1 s bin (-0.5 to +0.5 s) when stress naïve mice transit to SI zone (GCaMP6: Student *t*-test,  $t=0.20$   $p=0.84$ ; 405 nm: Mann Whitney test,  $U=5018$ ,  $p=0.19$ , Bars represent mean  $\pm$  s.e.m. for  $n=101,111$  epochs). **g** (Top) Dynamics of GCaMP6s signals and (Bottom) related 405nm signals (z-scores mean  $\pm$  s.e.m.) 5 s before and 5 s after the mice enter in SI zone without social target present (blue) and with social target present (red) showing that VTA→BLA neuronal activity does not increase when stress naïve mice transit to SI zone, (onset) averaged signal z-scores within a 1 s bin (-0.5 to +0.5 s) when stress naïve mice transit to SI zone (t.test, GCaMP6s:  $t=0.41$   $p=0.87$ ,  $t=1.51$   $p=0.92$ , Bars represent mean  $\pm$  s.e.m. for  $n=74,84$  epochs). **h** (Top) Dynamics of GCaMP6f signals and (Bottom) related 405nm signals (z-scores mean  $\pm$  s.e.m.) 5s before and 5s after the mice enter in SI zone without social target present (blue) and with social target present (red) showing that VTA→BLA neuronal activity does not increase when stress naïve mice transit to SI zone, (onset) averaged signal z-scores within a 1 s bin (-0.5 to +0.5 s) when stress naïve mice transit to SI zone (t.test, GCaMP6f:  $t=0.48$   $p=0.54$ , 405nm:  $t=1.74$   $p=0.087$ , Bars represent mean  $\pm$  s.e.m. for  $n=24,27$  epochs). In all panels, data are represented as mean  $\pm$  s.e.m.; two-sided statistical analyses were performed.

**Supplementary Fig. 5. VTA→BLA neuronal dynamic correlates with anxiety-like behaviors. a-e** Before CSDS. **a** Pearson correlation analyses of mean VTA→BLA activity as mean  $\Delta F/F$  z-score AUC in EPM center and closed arms with the time in EPM center and closed arms ( $r^2=0.01$   $p=0.03$ ,  $r^2=0.19$   $p=0.14$ ,  $n=23$  stress naïve C57BL6/J mice). **b** Pearson correlation analyses of VTA→BLA activity expressed as events per minute with the time (%) in EPM center and closed arms ( $r^2=0.02$ ,  $r^2=0.21$ ,  $p=0.19$ ,  $p=0.02$ ,  $n=23$  C57BL6/J mice). **c** Dynamics of 405 nm signals (z-scores mean  $\pm$  s.e.m.) 5 s before and 5 s after the mice enter in EPM center, closed and open arms; (onset) averaged 405 nm signal z-scores within a 1 s bin (-0.5 to +0.5 s) while the mice enter in EPM closed arms, center or open arms (ANOVA,  $F_{2/276}=1.798$ ,  $p=0.17$ , bars represent mean  $\pm$  s.e.m. for  $n=80,98,100$  epochs). **d** (Right) Dynamics of GCaMP6s and (Left) related 405 nm signals (z-scores mean  $\pm$  s.e.m.) 5 s before and 5 s after the mice enter in EPM center, closed and open arms (ANOVA, GCaMP6s:  $F_{2,213}=6.91$ ,  $p=0.006$ , post hoc  $t=2.92$   $p=0.01$ ,  $t=2.82$

p=0.02; 405 nm:  $F_{2,213}=2.49$ ,  $p=0.09$ ,  $n=62,72,80$  epochs). **e** (Right) Dynamics of GCaMP6f and (Left) related 405 nm signals (z-scores mean  $\pm$  s.e.m.) 5 s before and 5 s after the mice enter in EPM center, closed and open arms (ANOVA, GCaMP6f:  $F_{2,60}=5.406$ ,  $p=0.007$ , post hoc  $t=2.33$   $p=0.049$ ,  $t=3.28$   $p=0.005$ ; 405nm:  $F_{2,60}=0.014$ ,  $p=0.68$ ,  $n=20-25$ ). **f-i** After CSDS. **f** Spearman correlation analyses of mean VTA $\rightarrow$ BLA activity as mean  $\Delta F/F$  z-score AUC in EPM center and closed arms with the time in EPM open arms, center and closed arms after CSDS (CTL mice  $r=0.82$   $p=0.03$ , AD & A mice  $r=0.45$ ,  $p=0.08$ ,  $r=0.02$ ,  $p=0.92$ ,  $r=-0.3$   $p=0.16$ ,  $n=23$  mice). **g** Spearman correlation analyses of VTA $\rightarrow$ BLA activity with the time (%) in EPM open arms, center and closed arms (CTL mice  $r=0.14$ ,  $p=0.78$ , AD & A mice  $r=0.51$   $p=0.04$ ,  $r=0.34$   $p=0.10$ ,  $r=-0.52$   $p=0.01$ ,  $n=23$  mice). **h** Dynamics of 405 nm signals (z-scores mean  $\pm$  s.e.m.) 5 s before and 5 s after the socially stressed mice enter in EPM center, closed and open arms; (onset) averaged 405 nm signal z-scores within a 1 s bin (-0.5 to +0.5 s) while the mice enter in EPM closed arms, center or open arms (ANOVA,  $F_{2,188}=2.538$ ,  $p=0.082$ , bars represent mean  $\pm$  s.e.m. for  $n=46,65,75$  epochs). **i** Dynamics of 405nm signals (z-scores mean  $\pm$  s.e.m.) 5 s before and 5 s after the control mice enter in EPM center, closed and open arms (ANOVA,  $F_{2,92}=1.203$ ,  $p=0.30$ , Bars represent mean  $\pm$  s.e.m. for  $n=30,30,35$  number of trials). In all panels, data are represented as mean  $\pm$  s.e.m.; two-sided statistical analyses and post hoc corrected tests were performed, \* $p<0.05$ , \*\* $p<0.01$ .

**Supplementary Fig. 6. NpHR optogenetic modulation of VTA  $\rightarrow$  BLA neurons induces anxiety-like behaviors.** **a** Schematic of the VTA  $\rightarrow$  BLA brain surgery in C57BL6/J mice, immunohistochemistry validation (scale bar, 100  $\mu$  m) and quantification of 83% colocalization (3-4 sections per mouse from 3 mice). **b-c** Supplementary results of mouse behaviors depicted in Fig. 4. **b** NpHR optogenetic modulation ON of Sub.D-NpHR and Sub.D-eYFP mice (respective Mann-Whitney or t-test analysis analysis, Number of EPM open arms entries:  $U=20$   $p=0.33$ ; Time (s) in EPM open arms:  $t=2.333$   $p=0.032$ , closed arms:  $t=3.65$   $p=0.002$ , center:  $t=0.927$   $p=0.37$ , velocity:  $t=0.916$   $p=0.37$ , and locomotion:  $t=1.028$   $p=0.32$ ). **c** Same as **b** while NpHR optogenetic modulation OFF (respective Mann-Whitney or t-test analysis, Number of EPM open arms entries:  $t=1.124$   $p=0.27$ , Time (s) in EPM open arms:  $t=0.684$   $p=0.50$ , closed arms:  $t=0.863$   $p=0.40$ ,

center:  $t=0.040$   $p=0.93$ , velocity:  $U=33$   $p=0.35$ , locomotion:  $U=31$   $p=0.28$ ). In all panels, data are represented as mean  $\pm$  s.e.m.,  $n=9$ , 10 mice; two-sided statistical analyses were performed,  $*p<0.05$ ,  $**p<0.01$ .

**Supplementary Fig. 7. NpHR optogenetic modulation of VTA  $\rightarrow$  BLA neurons induces anxiety-like behaviors in stress-naïve control mice.**

**a** Timeline and schematic of the behavioral experiment in stress-naïve CTL C57BL6/J mice. **b** NpHR optogenetic modulation ON: 0.1Hz 5s pulse width, in CTL-NpHR and CTL-eYFP mice (respective Mann-Whitney or t-test analyses, Time (%) in EPM open arms:  $t=0.97$   $p=0.38$ , Number of EPM open arms entries:  $t=1.39$   $p=0.19$ , Time (s) in EPM open arms:  $t=0.29$   $p=0.79$ , closed arms:  $U=26$   $p=0.69$ , center:  $t=0.58$   $p=0.57$ , velocity:  $t=1.68$   $p=0.07$ , locomotion:  $t=1.593$   $p=0.13$ ). **c** Same as **b** while NpHR optogenetic modulation OFF (respective Mann-Whitney or t-test analysis, Time (%) in EPM open arms:  $U=16$   $p=0.33$ , Number of EPM open arms entries:  $U=20$   $p=0.67$ , Time (s) in EPM open arms:  $U=17$   $p=0.33$ , closed arms:  $U=14$   $p=0.23$ , center:  $t=0.38$   $p=0.79$ , velocity:  $t=1.4$   $p=0.15$ , locomotion:  $t=0.25$   $p=0.61$ ). Bars represent mean  $\pm$  s.e.m. for  $n=8,7$  number of mice.

**d** Separate cohort of stress-naïve CTL C57BL6/J mice and NpHR mice exposed to optogenetic modulation ON during the 300 s EPM trial of CTL-NpHR and CTL-eYFP mice (respective Mann-Whitney or t-test analyses, Time (%) in EPM open arms:  $t=3.029$ ,  $p=0.007$ , Number of EPM open arms entries:  $t=1.19$   $p=0.25$ , Time (s) in EPM open arms:  $t=3.029$   $p=0.007$ , closed arms:  $t=1.993$   $p=0.06$ , center:  $t=1.509$   $p=0.14$ , velocity:  $U=36$   $p=0.31$ , locomotion:  $U=24$   $p=0.052$ ,  $n=10,10$  mice). **e** Same as **d** while NpHR optogenetic modulation OFF (respective Mann-Whitney or t-test analysis, Time (%) in EPM open arms:  $t=0.17$   $p=0.86$ , Number of EPM open arms entries:  $t=0.95$   $p=0.35$ , Time (s) in EPM open arms:  $U=42$   $p=0.57$ , closed arms:  $t=0.95$   $p=0.35$ , center:  $t=1.37$   $p=0.18$ , velocity:  $U=45$   $p=0.73$ , locomotion:  $U=39$   $p=0.43$ ,  $n=10,10$  number of mice. In all panels, data are represented as mean  $\pm$  s.e.m.; two-sided statistical analyses were performed,  $*p<0.05$ ,  $**p<0.01$ .

**Supplementary Fig. 8. NpHR optogenetic modulation of VTA  $\rightarrow$  BLA neurons induces transient anxiety-like behaviors but not depressive-like behaviors. a**

Experimental timeline in a separate cohort of C57BL6/J mice. **b** NpHR optogenetic modulation ON -0.1Hz 5 s pulse width, in Sub.D-NpHR and Sub.D-eYFP mice, n=11,12 number of mice, performing a social interaction, female urine sniffing, EPM and OFT tests (t=0.55 p=0.52, t=0.57 p=0.56, t=0.79 p=0.44, t=0.20 p=0.84, t=2.619 p=0.042, t=1.826 p=0.06, t=1.97 p=0.53, t=2.087 p=0.049, t=0.69 p=0.49, t=0.68 p=0.50). **c** Same as **b** while NpHR optogenetic modulation OFF (t=0.88 p=0.44, t=0.067 p=0.94, t=0.78 p=0.44, t=0.27 p=0.77, t=0.19 p=0.87, t=0.27 p=0.78, t=0.14 p=0.82, U=36 p=0.069, U=63 p=0.88, t=0.77 p=0.44). **d** Sucrose preference and Time (%) in EPM open arms 7 days after the last NpHR optogenetic modulation (respective analysis, t=0.1228 p=0.90, t=1.313 p=0.72, p>0.05). In all panels, data are represented as mean  $\pm$  s.e.m.; two-sided Mann-Whitney or t-test statistical analyses were performed, \*p<0.05.

**Supplementary Fig. 9. ChR2 optogenetic stimulation of VTA  $\rightarrow$  BLA neurons reduces anxiety-like behaviors.** **a** Schematic of the VTA  $\rightarrow$  BLA brain surgery in C57BL6/J mice, immunohistochemistry validation (scale bar, 100  $\mu$ m) and quantification of 82% colocalization (3-4 sections per mouse from 3 mice). **b-g** Supplementary analysis of mouse behaviors depicted in Fig. 4. **b** Social interaction behaviors following CSDS (ANOVA,  $F_{2/60}=19.37$  p=6.05e-07; post hoc test corrected p-values, t=5.53 p=0.001; t=4.94 p=0.001, t=0.089 p=0.93, CTL n=25, AD n=18 and A n=17 mice). **c** Time (%) spent in open arms in AD mice: (Left) EPM test while ChR2 optogenetic stimulation is OFF, (Middle) all trial ChR2 optogenetic stimulation; (Right) ChR2 optogenetic stimulation selective to the EPM center (t-tests: t=0.21 p=0.84, t=2.13 p=0.49, t=2.81 p=0.02, n=9, 9). **d** Same, as **c** in A mice (t-test and Mann-Whitney test: t=0.067 p=0.94, U=47 p=0.018, t=2.81 p=0.017, n=8, 9). **e** EPM test while ChR2 optogenetic stimulation is OFF in CSDS-eYFP mice and CSDS-ChR2 mice (respective analysis, Number of EPM open arms entries: t=0.71 p=0.48, Time (s) in EPM open arms: t-tests, t=0.09 p=0.96, closed arms: t=0.65 p=0.5, center: t=0.513 p=0.67, velocity: t=0.20 p=0.99, locomotion: t=0.30 p=0.98, p>0.05, n=17, 19). **f** Same as **e** while during all trial ChR2 optogenetic stimulation (respective t-tests analysis, t=2.94 p=0.006, t=3.38 p=0.002, t=2.30 p=0.03, t=3.6 p=0.001, t=1.69 p=0.28; t=1.99 p=0.16, n=17, 19 number of mice). **g** Same as **e** while during ChR2 optogenetic stimulation selective to the EPM center (respective t-tests



analysis,  $t=3.94$   $p=0.006$ ,  $t=3.66$   $p=0.0008$ ,  $t=2.75$   $p=0.009$ ;  $t=3.77$   $p=0.007$ ;  $t=1.10$   $p=0.62$ ;  $t=0.86$   $p=0.77$ ,  $n=17, 19$ ). In all panels, data are represented as mean  $\pm$  s.e.m. for  $n$  number of mice; two-sided statistical analyses and post hoc corrected tests were performed, \* $p<0.05$ , \*\* $p<0.01$ , \*\*\* $p<0.001$ .

**Supplementary Fig. 10. ChR2 optogenetic stimulation of VTA  $\rightarrow$  BLA neurons rescues anxiety-like behaviors but not depressive-like behaviors.** **a** Experimental timeline in a separate cohort of C57BL6/J mice. **b** Social interaction behaviors, preference for female urine, time (%) in EPM open arms, time (%) in OFT center, velocity and locomotion in AD-ChR2 and AD-eYFP mice before optogenetic stimulation ( $t=1.06$   $p=0.30$ ,  $t=0.577$   $p=0.57$ ,  $t=0.20$   $p=0.83$ ,  $t=0.348$   $p=0.73$ ,  $t=1.67$   $p=0.11$ ,  $t=1.178$   $p=0.26$ ,  $t=0.978$   $p=0.34$ ). **b'** Social interaction behaviors, preference for female urine, time (%) in EPM open arms, time (%) in OFT center, velocity and locomotion in AD-ChR2 and AD-eYFP mice during ChR2 optogenetic stimulation ( $t=0.78$   $p=0.44$ ,  $t=0.07$   $p=0.93$ ,  $t=2.430$   $p=0.031$ ,  $t=3.81$   $p=0.001$ ,  $t=2.152$   $p=0.47$ ,  $t=1.158$   $p=0.26$ ,  $t=1.135$   $p=0.27$ ). **c** Social interaction behaviors, preference for female urine, time (%) in EPM open arms, time (%) in OFT center, velocity and locomotion in A-ChR2 and A-eYFP mice before optogenetic stimulation ( $t=0.94$   $p=0.36$ ,  $t=0.91$   $p=0.38$ ,  $t=0.53$   $p=0.60$ ,  $t=0.54$   $p=0.59$ ,  $t=0.13$   $p=0.89$ ,  $t=1.89$   $p=0.06$ ,  $t=1.55$   $p=0.15$ ). **c'** Social interaction behaviors, preference for female urine, time (%) in EPM open arms, time (%) in OFT center, velocity and locomotion in A-ChR2 and A-eYFP mice during ChR2 optogenetic stimulation ( $t=0.397$   $p=0.69$ ,  $t=1.30$   $p=0.22$ ,  $t=2.408$   $p=0.04$ ,  $t=2.21$   $p=0.047$ ,  $t=0.28$   $p=0.61$ ,  $t=0.72$   $p=0.48$ ,  $t=0.889$   $p=0.39$ ). **d** Sucrose preference and Time (%) in EPM open arms 7 days after the last optogenetic modulation in AD-ChR2 and AD-eYFP mice ( $t=0.75$   $p=0.46$ ,  $U=31$ ,  $p=0.72$ ) and **e** Sucrose preference and Time (%) in EPM open arms 7 days after the last optogenetic modulation in A-ChR2 and A-eYFP mice ( $U=15.5$   $p=0.5$ ,  $t=0.83$ ,  $p=0.42$ ,  $n=6, 9$  mice). In all panels, data are represented as mean  $\pm$  s.e.m.; t-test or Mann-Whitney two-sided statistical analyses were performed, \* $p<0.05$ .

**Supplementary Fig. 11. ChR2 optogenetic stimulation of VTA  $\rightarrow$  BLA neurons in stress naïve mice.** **a** Timeline of ChR2 optogenetic experiments performed in stress

naïve CTL C57BL6/J mice. **b** EPM test while ChR2 optogenetic stimulation is OFF in stress-naïve CTL-eYFP mice and CTL-ChR2 mice (respective analysis, Time (%) in EPM open arms in CTL-ChR2 and CTL-eYFP mice, t-test,  $t=0.28$ ,  $p=0.77$ , Number of EPM open arms entries:  $t=0.54$   $p=0.93$ , Time (s) in EPM open arms:  $t=0.07$   $p=0.99$ , closed arms:  $t=0.76$   $p=0.84$ , center:  $t=0.99$   $p=0.69$ , velocity:  $t=0.11$   $p=0.99$ , locomotion:  $t=0.22$   $p=0.99$ ,  $n=12, 13$ ). **c** Same as **b** during all trial ChR2 optogenetic stimulation (respective analysis, Time (%) in EPM open arms in CTL-ChR2 and CTL-eYFP mice,  $t=0.66$ ,  $p=0.51$ , Number of EPM open arms entries:  $t=1.63$   $p=0.33$ , Time (s) in EPM open arms:  $t=1.79$   $p=0.25$ , closed arms:  $t=0.26$   $p=0.99$ , center:  $t=0.05$   $p=0.99$ , velocity:  $t=0.18$   $p=0.99$ , locomotion:  $t=0.004$ ,  $p=0.99$ ,  $n=8, 6$ ). **d** Same as **c** during ChR2 optogenetic stimulation selective to the EPM center (respective analysis, Time (%) in EPM open arms in CTL-ChR2 and CTL-eYFP mice, t-test:  $t=1.77$   $p=0.09$ , Number of EPM open arms entries  $t=2.19$   $p=0.13$ , Time (s) in EPM open arms:  $t=1.55$   $p=0.36$ , closed arms:  $t=0.93$   $p=0.74$ , center:  $t=1.07$   $p=0.65$ , velocity:  $t=0.11$   $p=0.99$ , locomotion:  $t=0.48$ ,  $p=0.95$ ,  $n=8, 11$ ). **e** Experimental timeline in a separate cohort of stress-naïve CTL C57BL6/J mice. **f** Social interaction behaviors, preference for female urine, time (%) in EPM open arms, time (%) in OFT center, velocity and locomotion in CTL-ChR2 and CTL-eYFP mice before optogenetic stimulation (respective analyses for  $n=9, 8$  mice,  $t=0.275$   $p=0.78$ ,  $U=21.5$   $p=0.176$ ,  $t=1.43$   $p=0.16$ ,  $t=0.62$   $p=0.545$ ,  $t=0.24$   $p=0.81$ ,  $t=0.25$   $p=0.80$ ,  $t=0.75$   $p=0.46$ ). **g** Social interaction behaviors, preference for female urine, time (%) in EPM open arms, time (%) in OFT center, velocity and locomotion in CTL-ChR2 and CTL-eYFP mice during ChR2 optogenetic stimulation (respective analyses,  $t=0.55$   $p=0.59$ ,  $U=34$   $p=0.88$ ,  $t=0.38$   $p=0.71$ ,  $t=0.88$   $p=0.38$ ,  $t=0.89$   $p=0.39$ ,  $t=0.62$   $p=0.51$ ,  $U=35$ ,  $p=0.67$ ,  $n=9, 8$  mice). **h** Sucrose preference and Time (%) in EPM open arms 7 days after the last optogenetic modulation (respective analyses,  $t=0.81$   $p=0.43$ ,  $t=1.251$ ,  $p=0.22$  for  $n=9, 8$  mice). In all panels, data are represented as mean  $\pm$  s.e.m.; two-sided statistical analyses were performed.

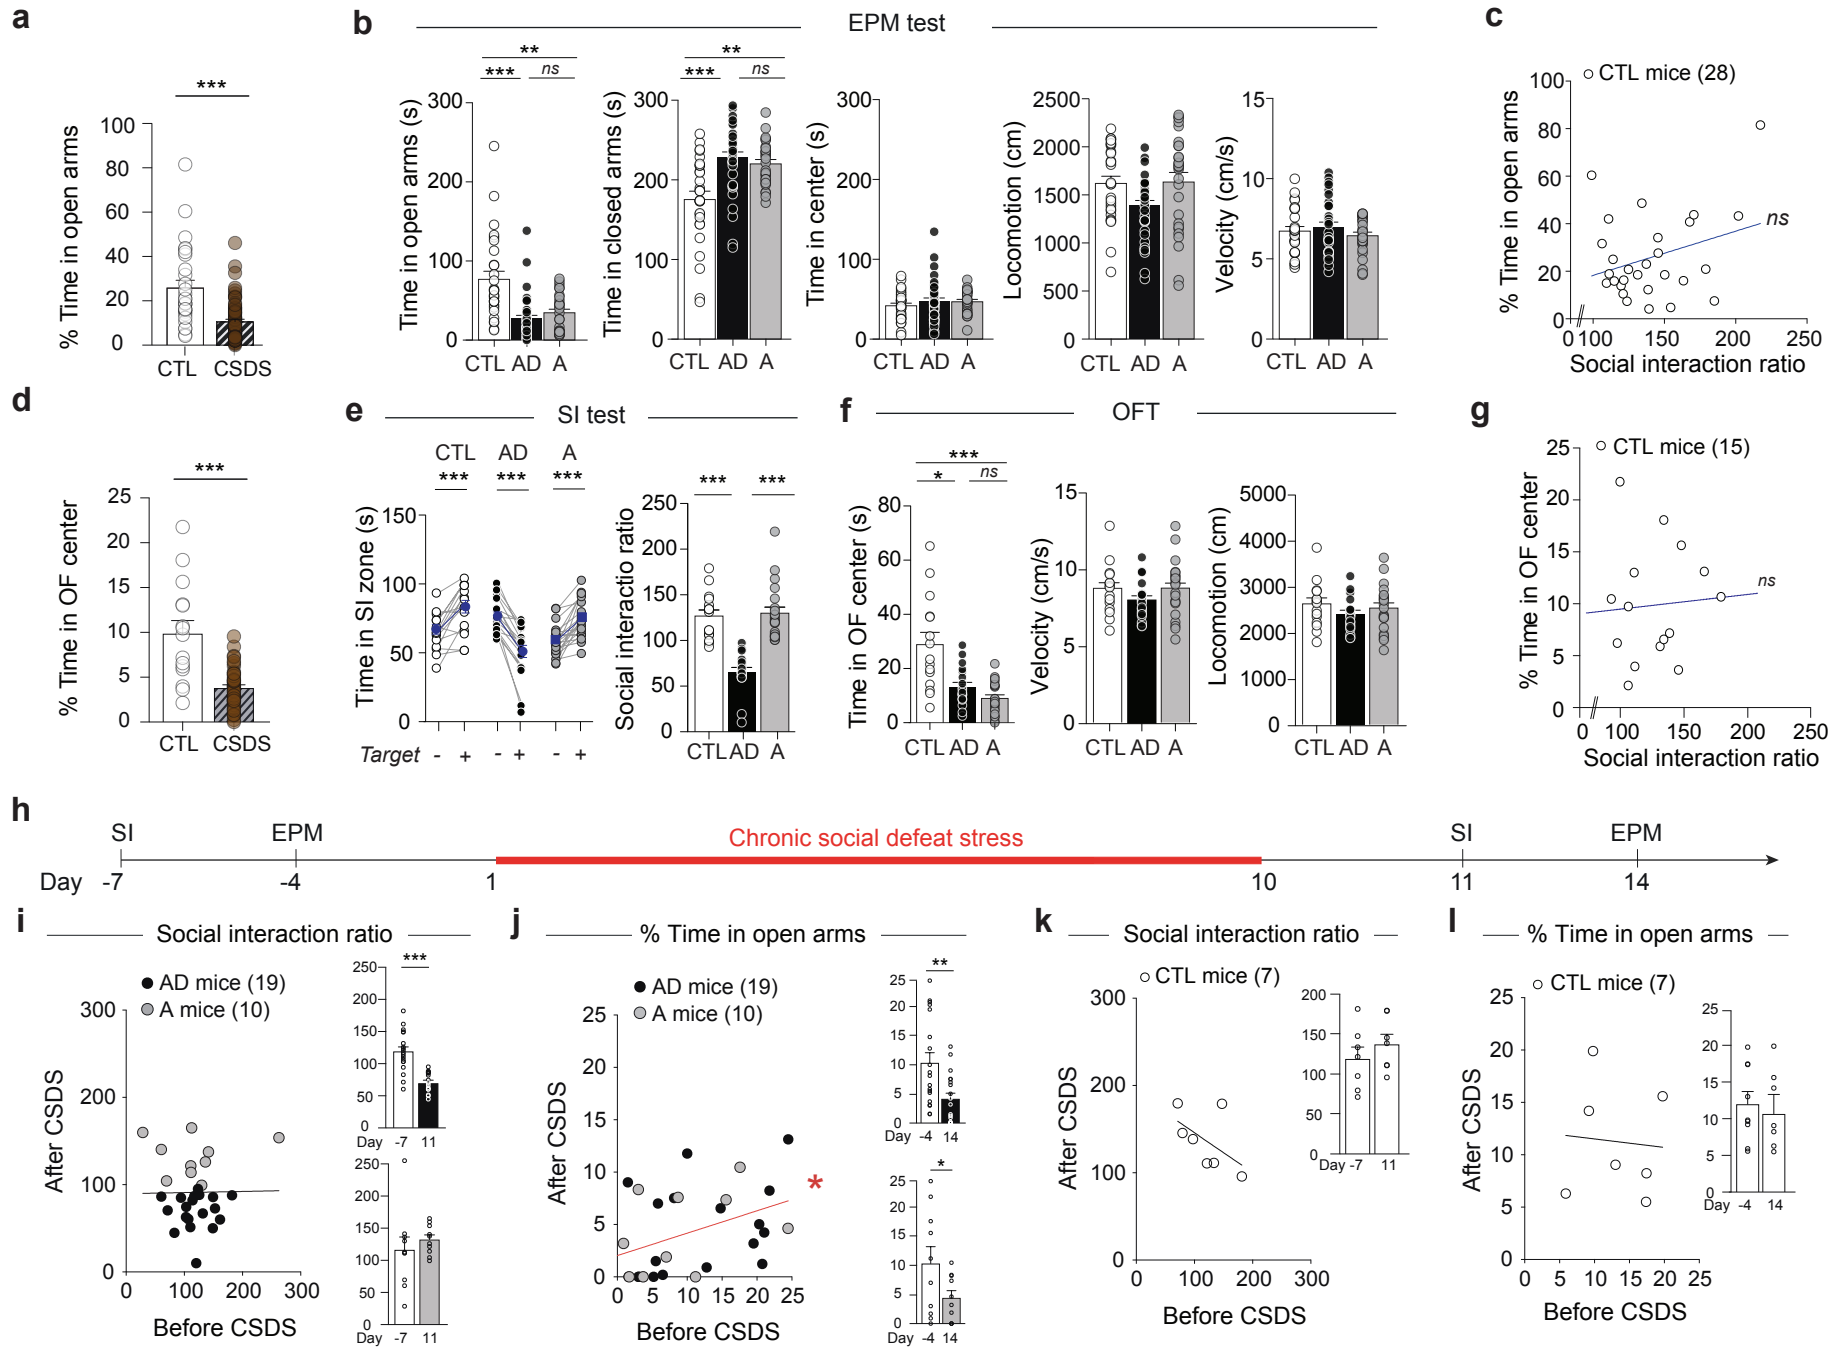

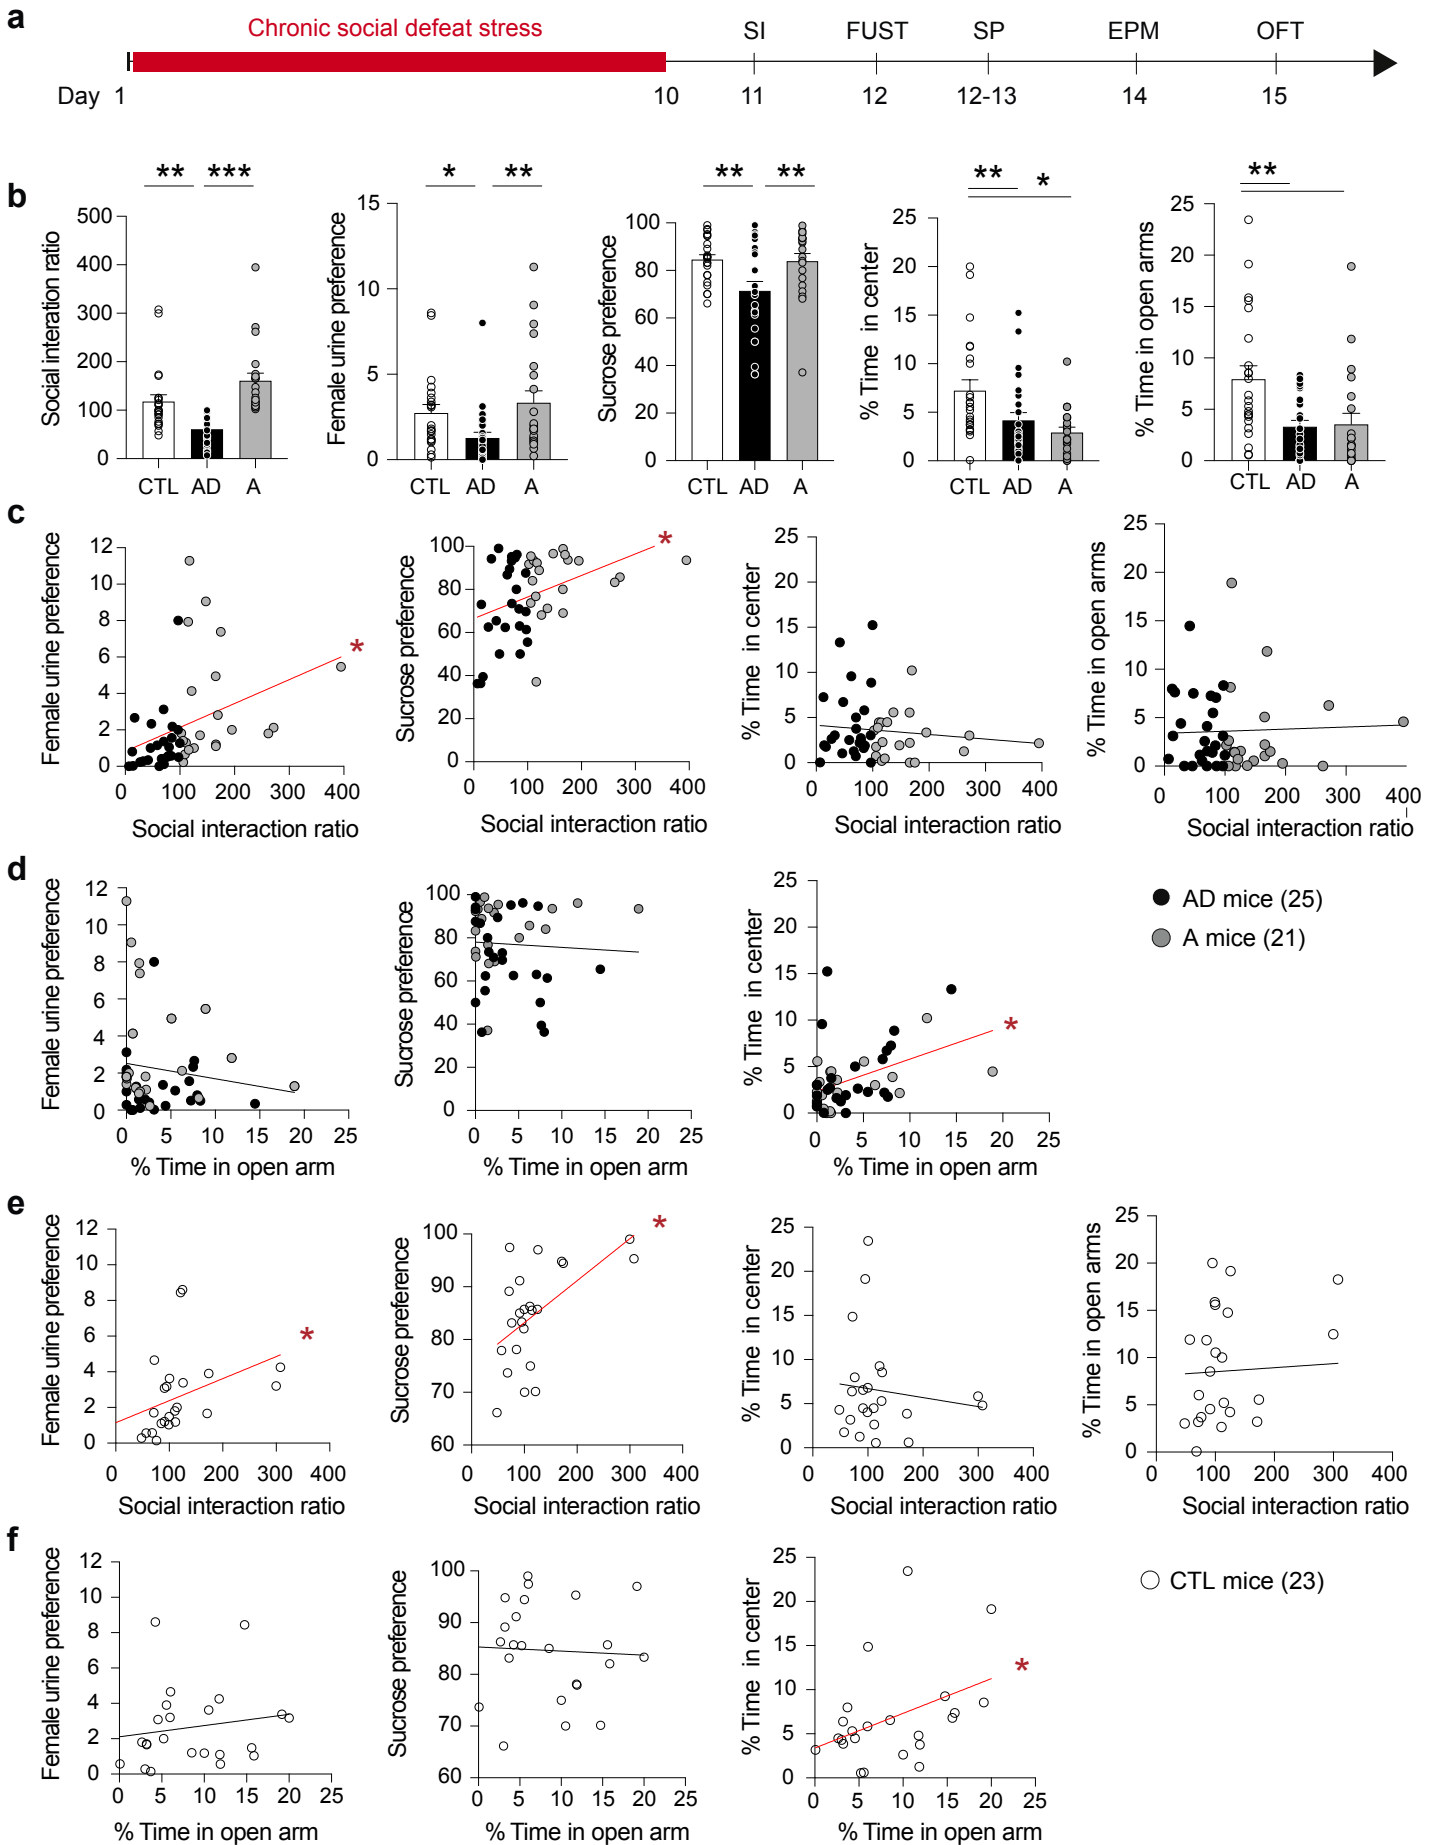

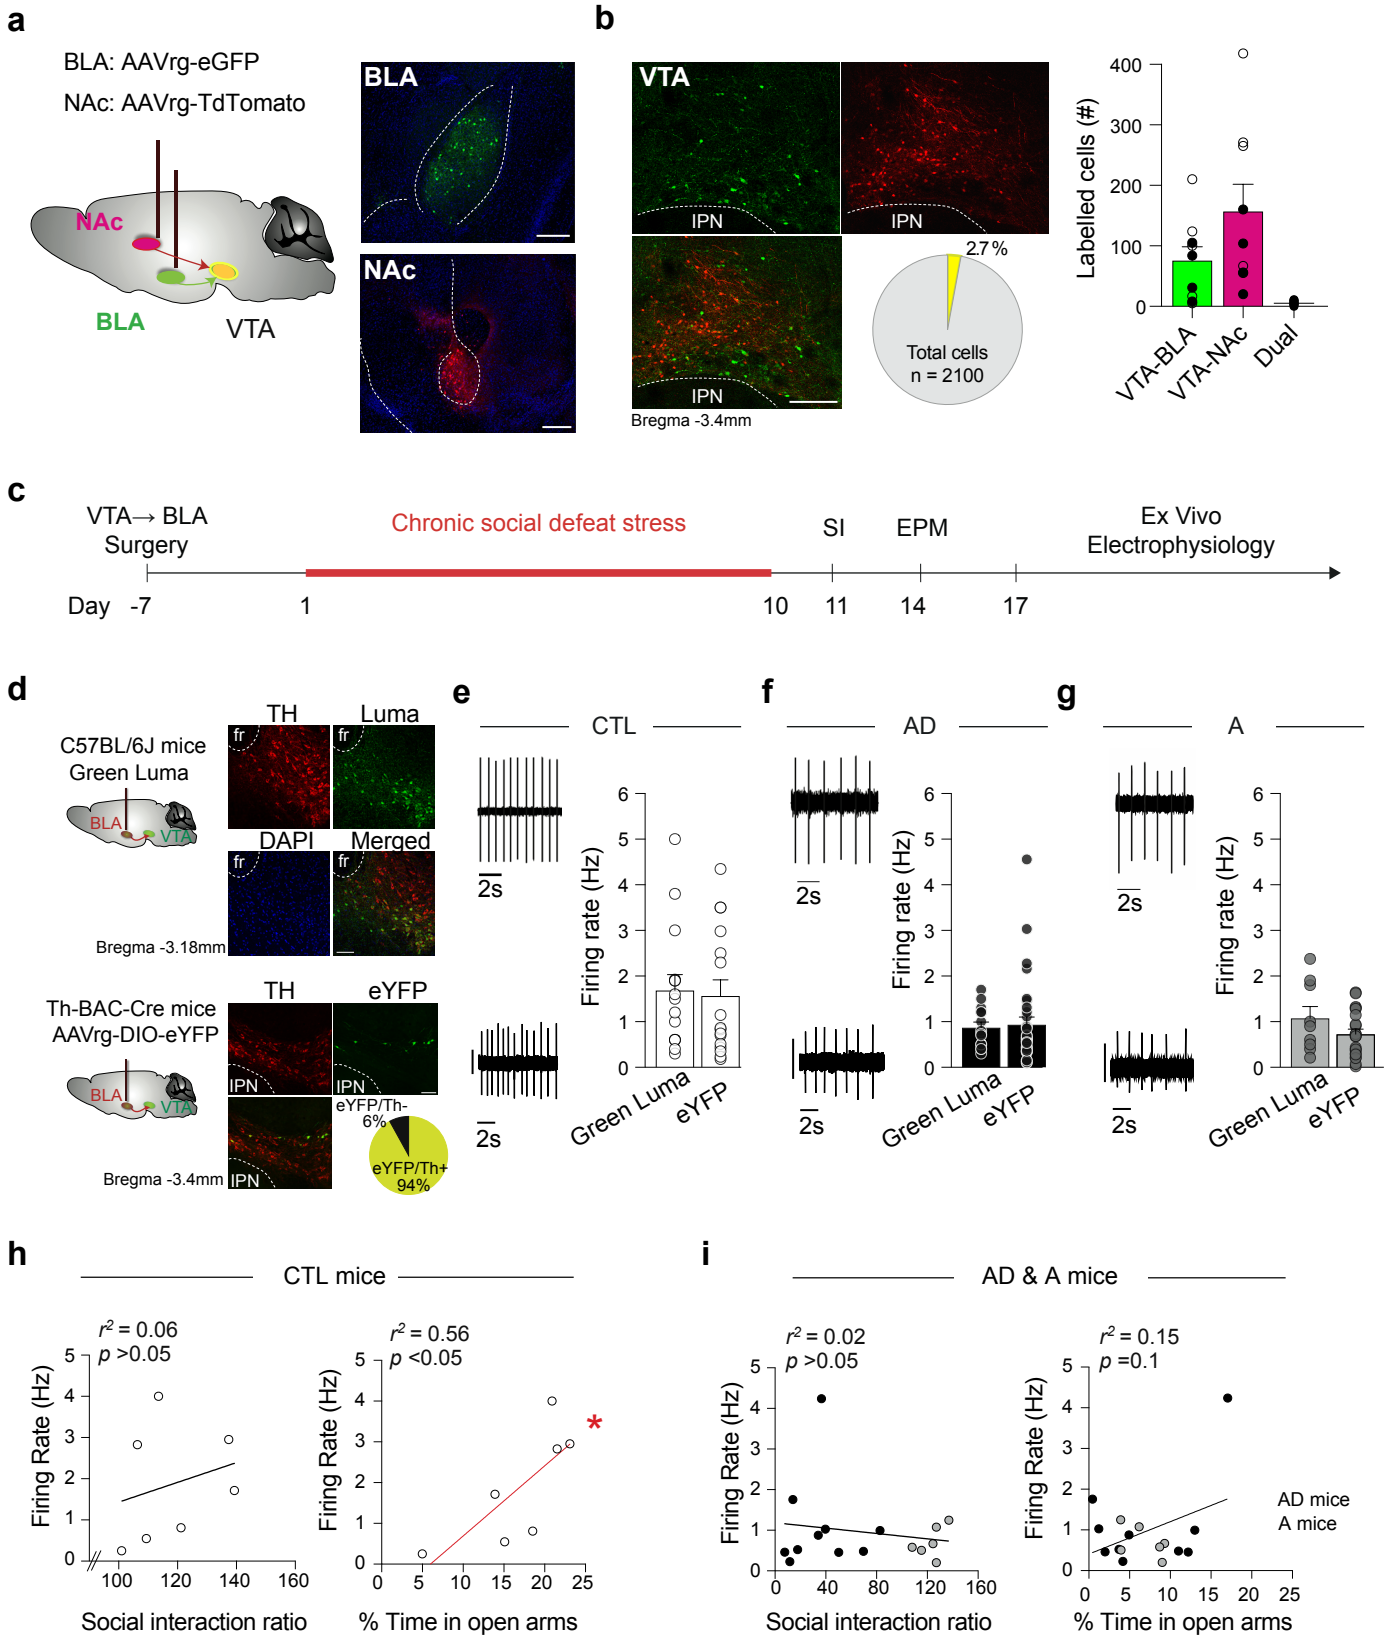

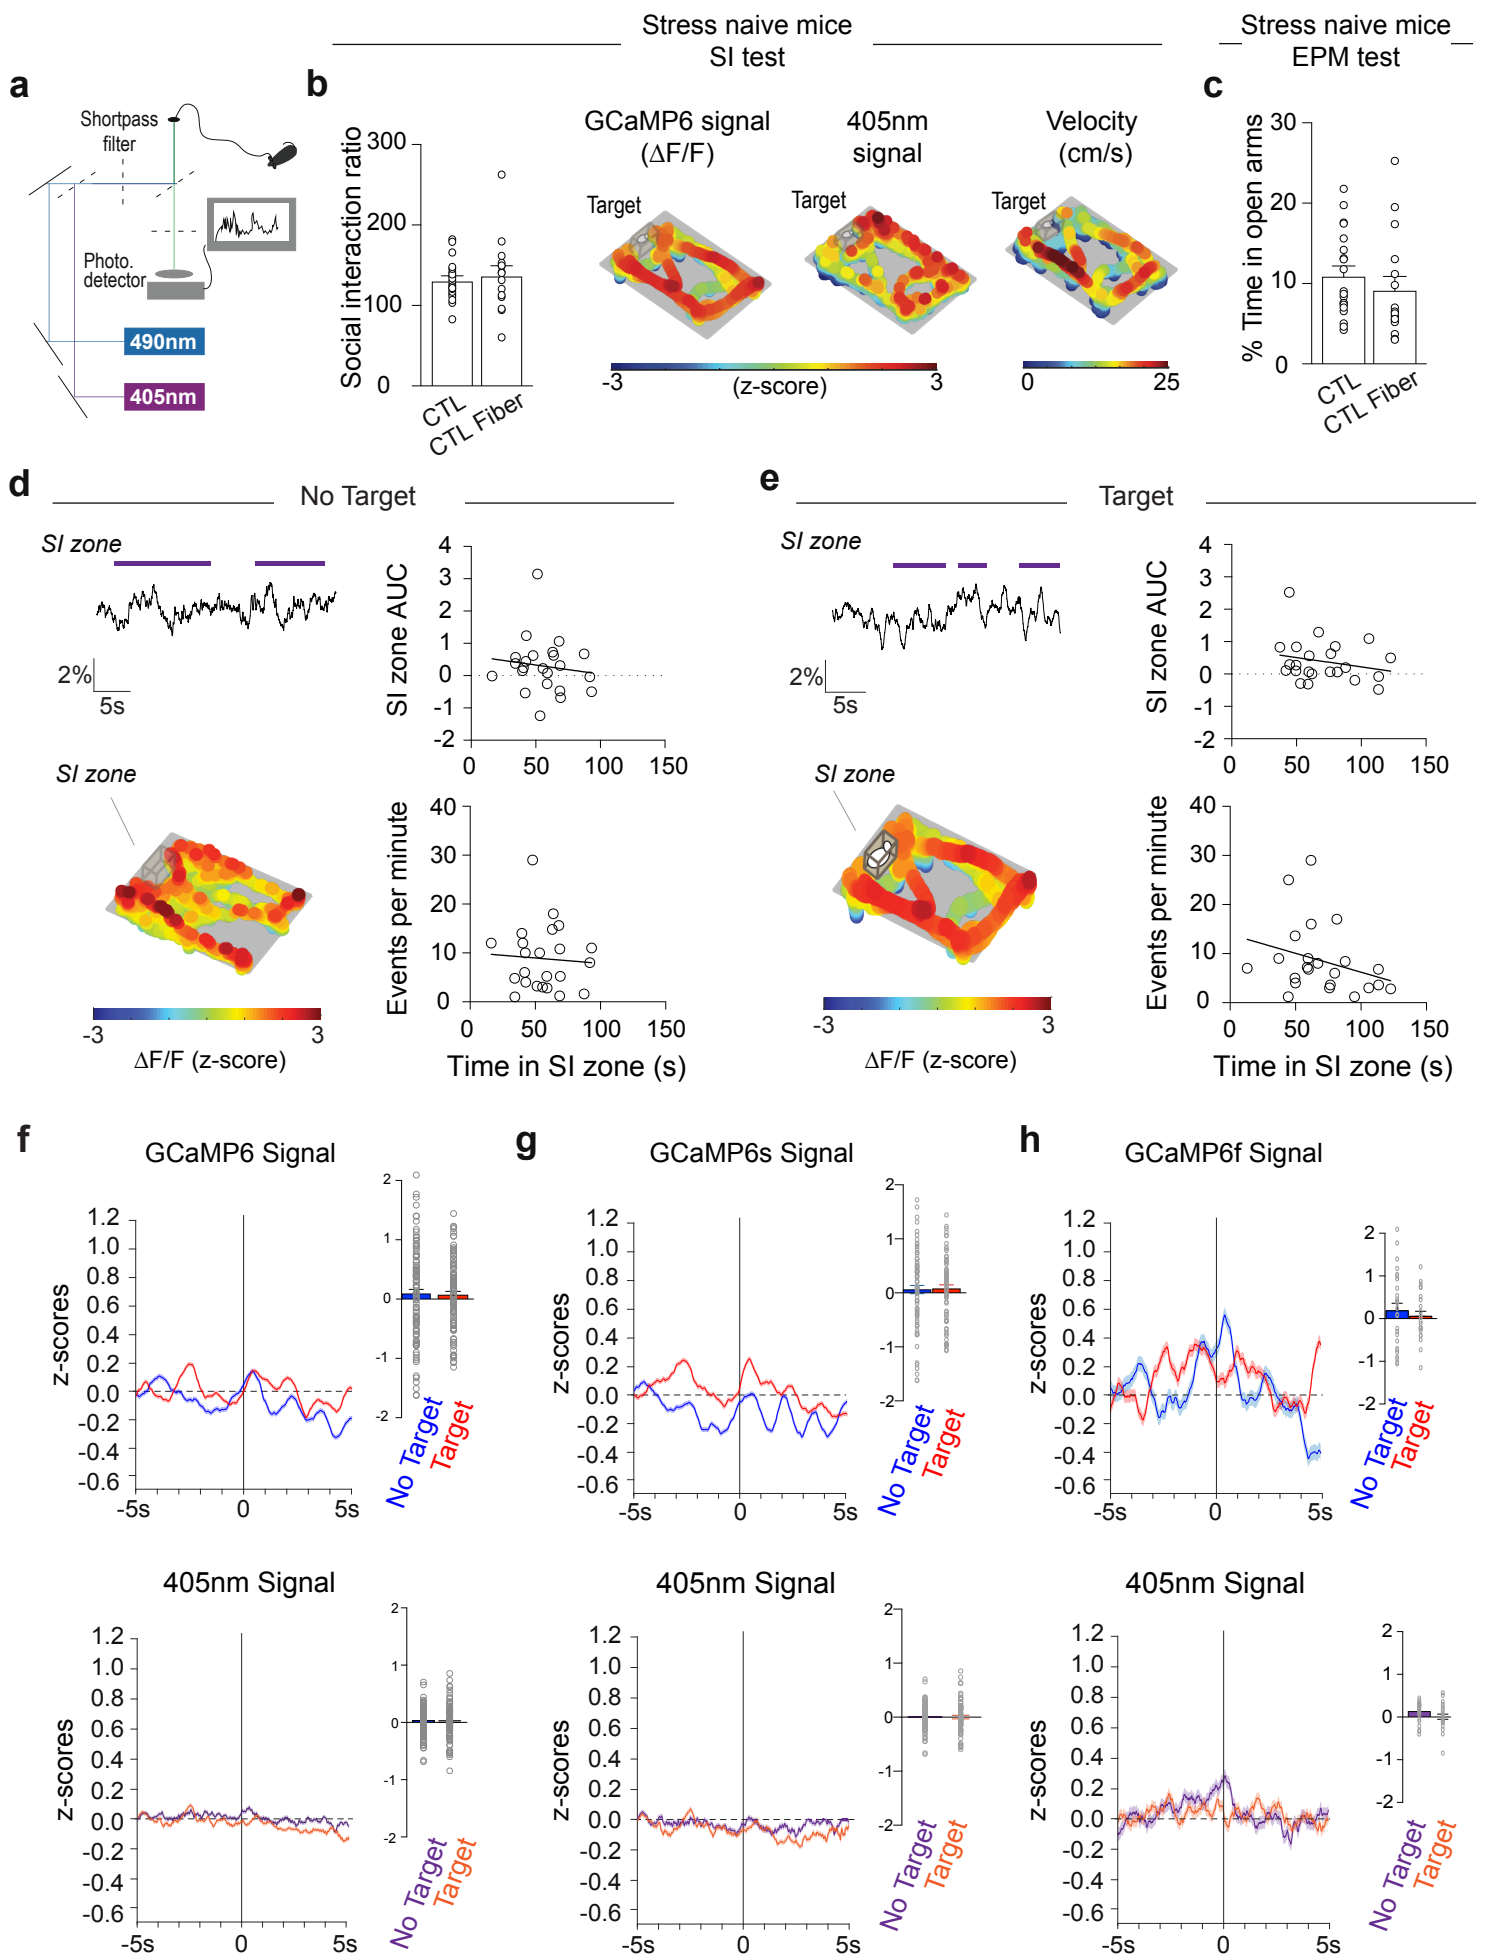

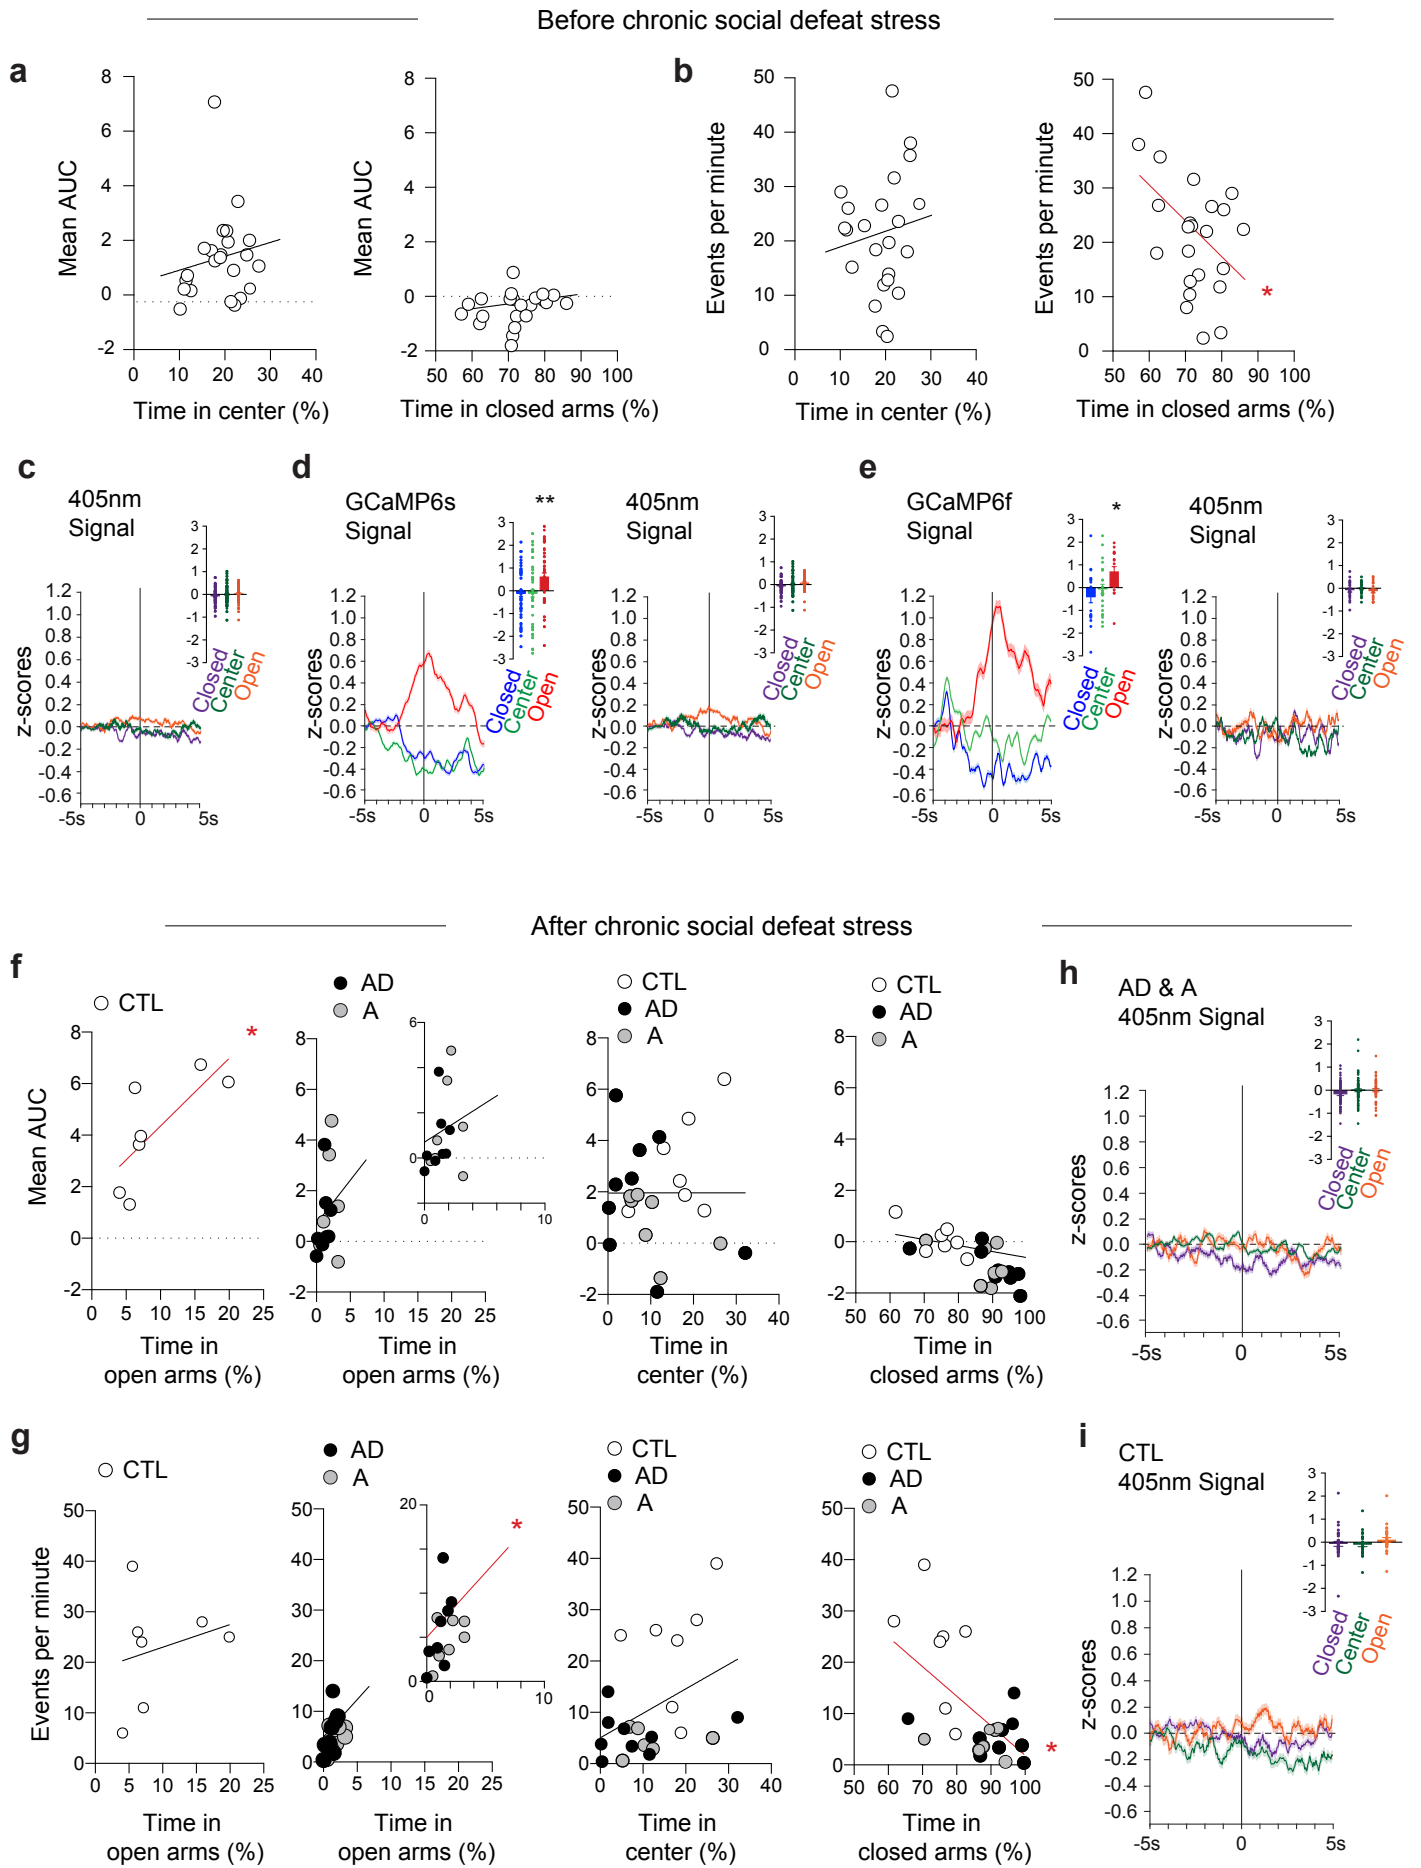

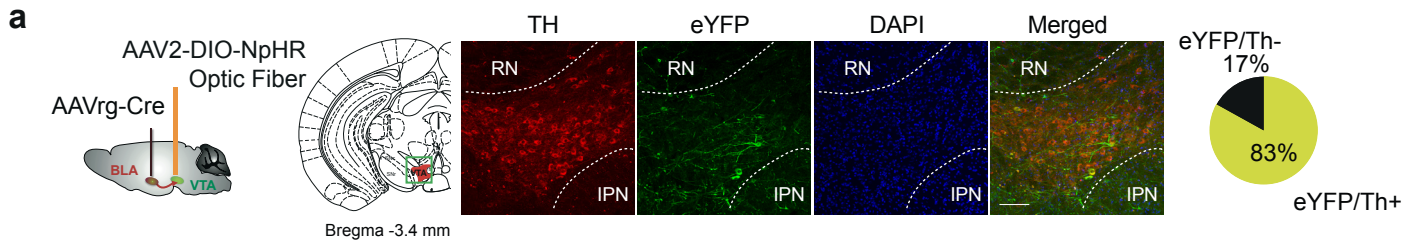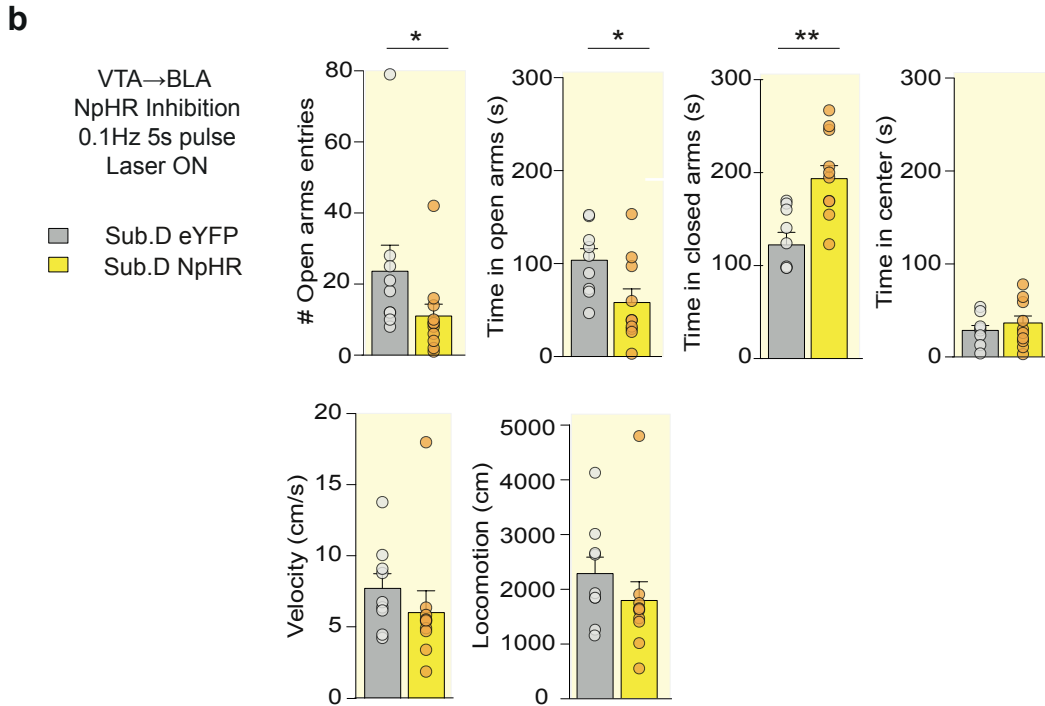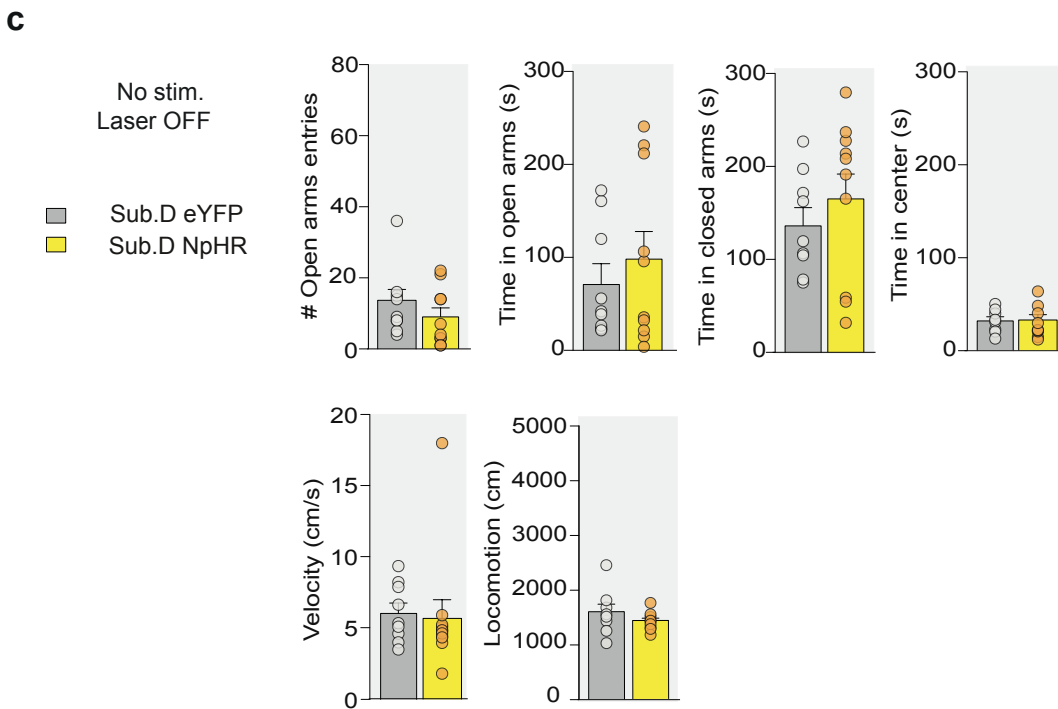



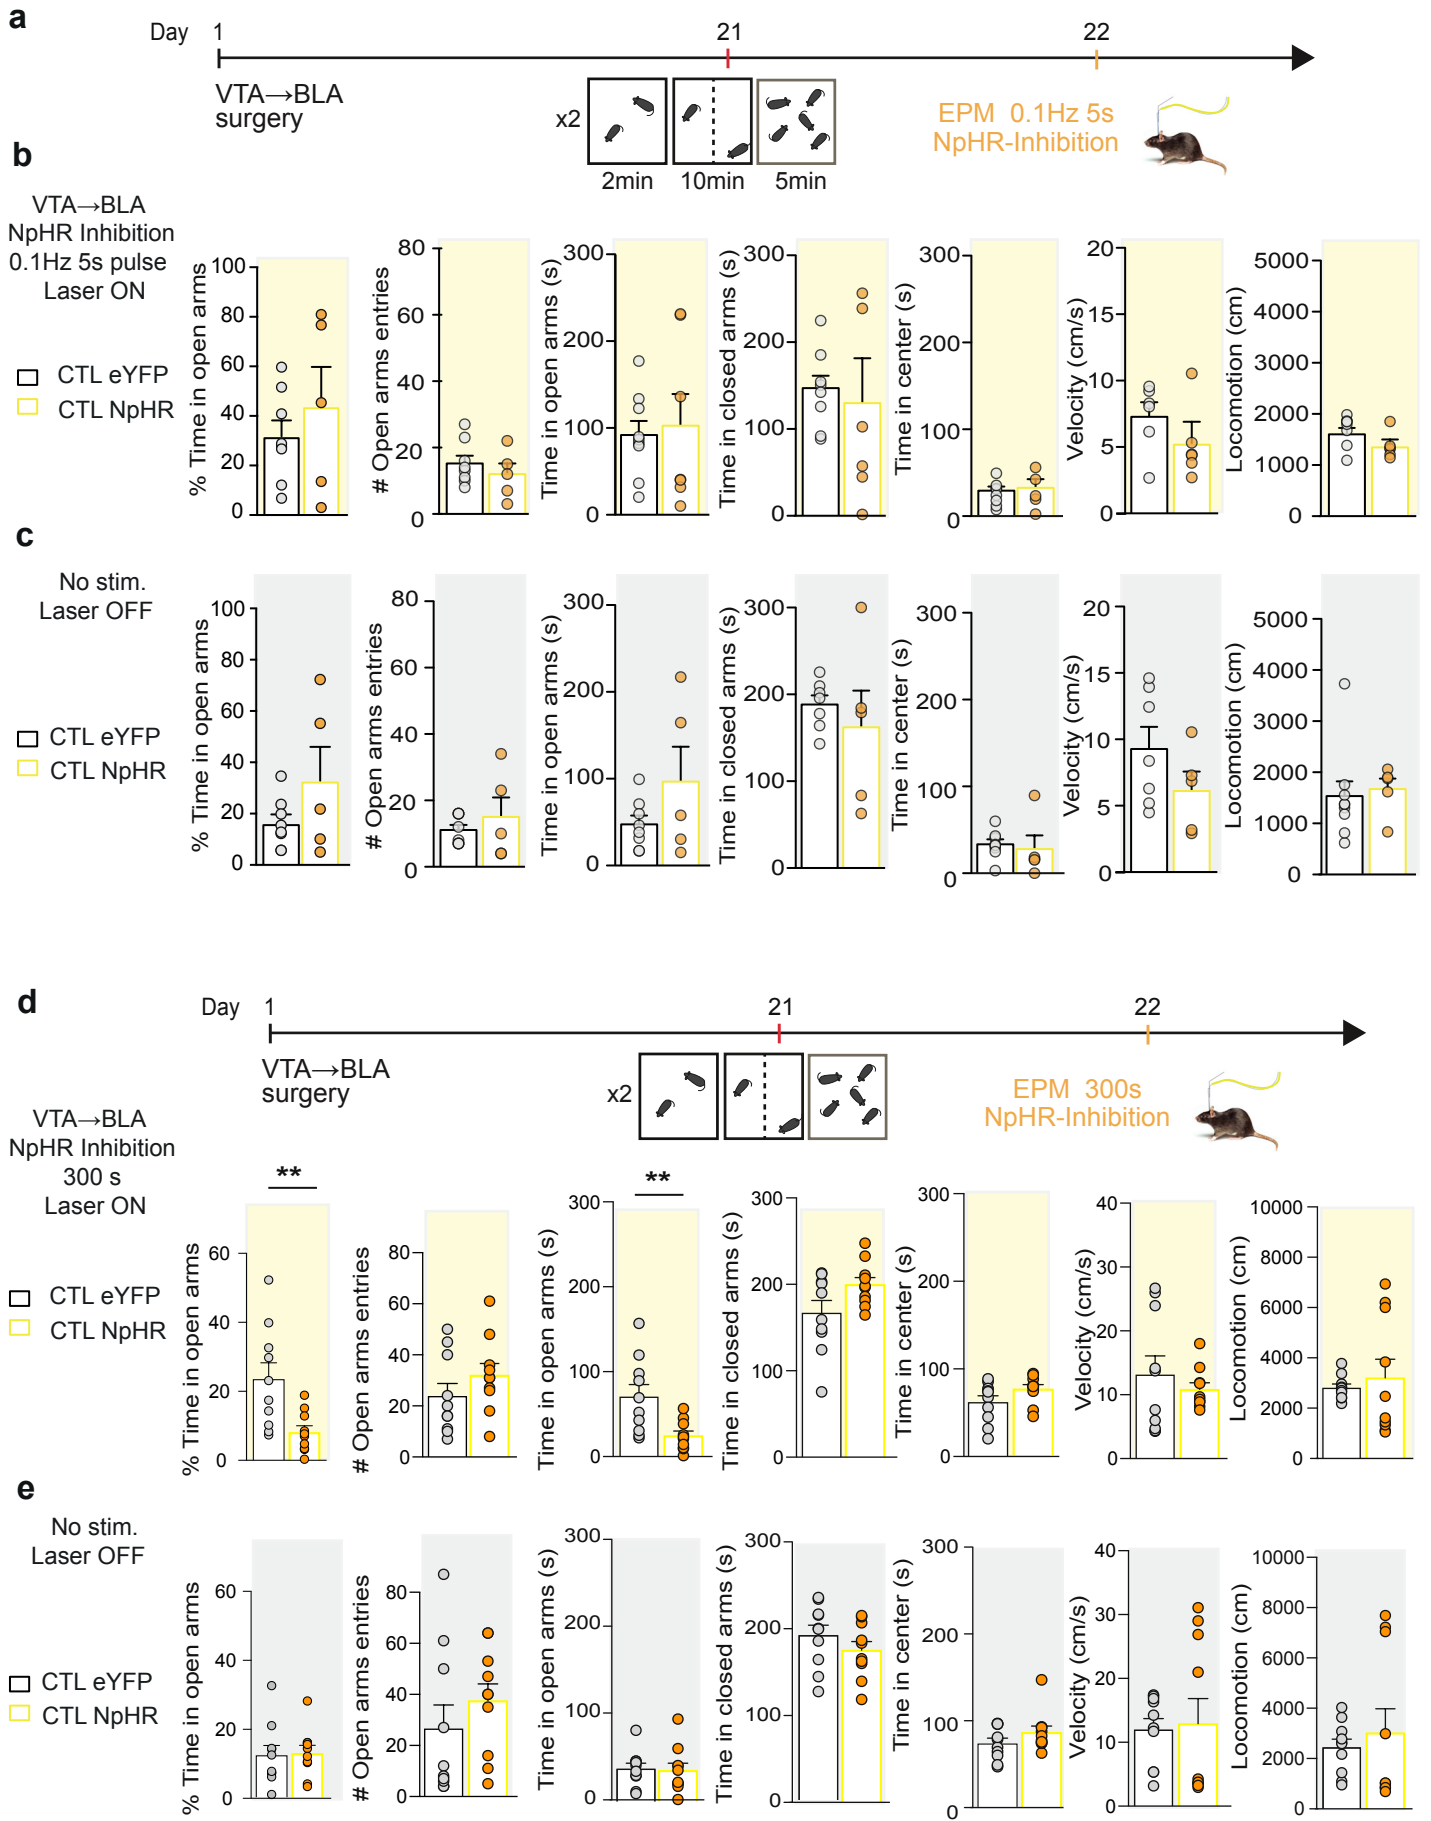

Sup. Figure 7

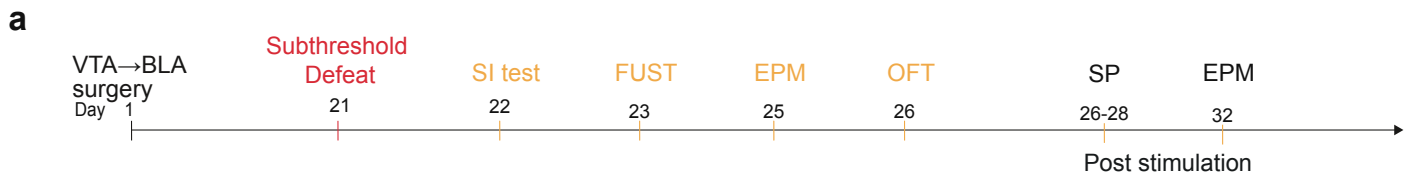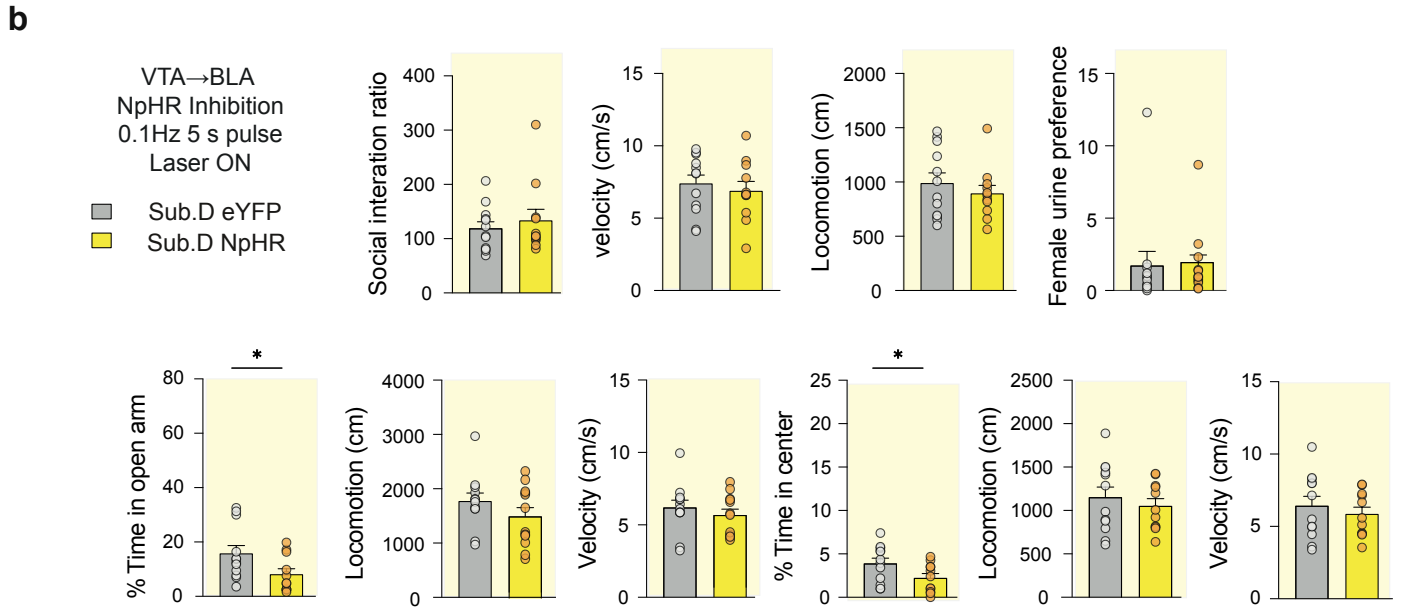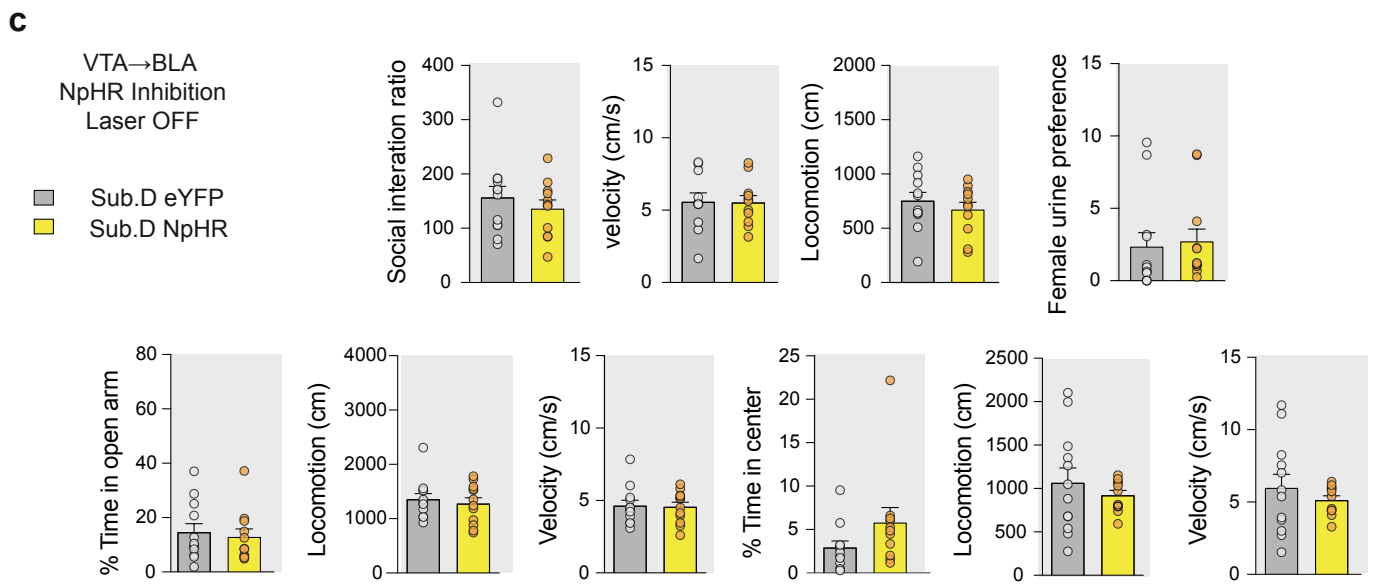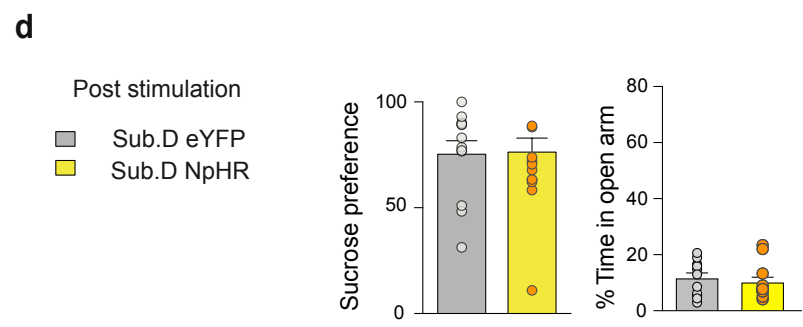

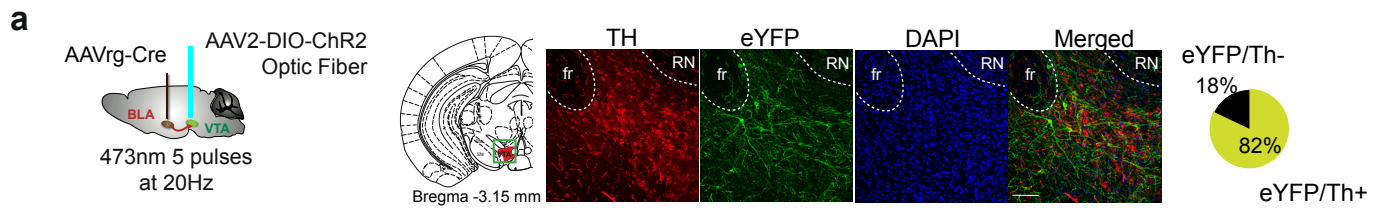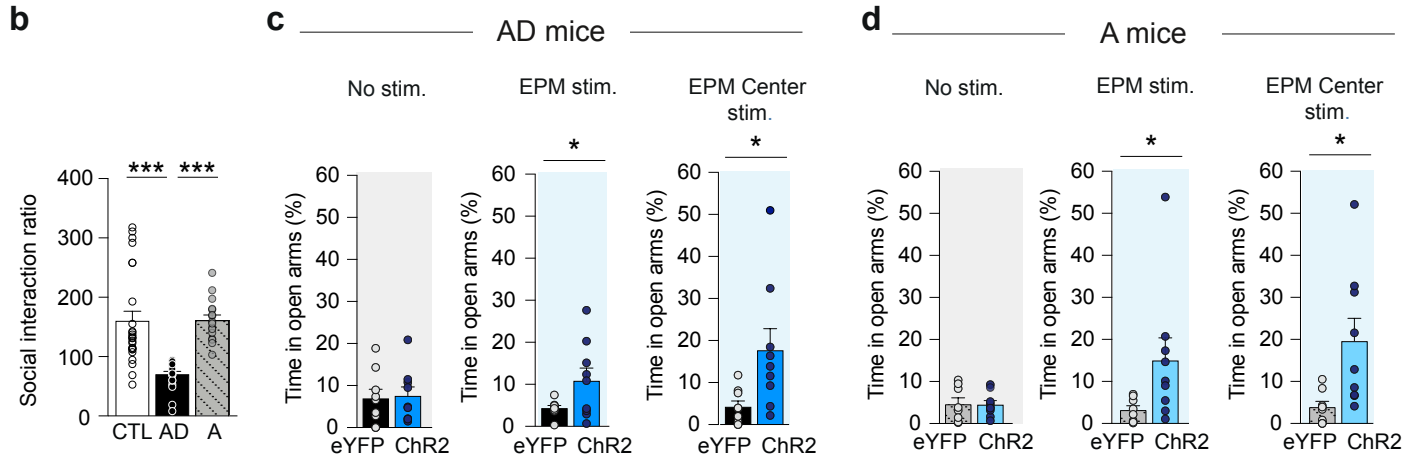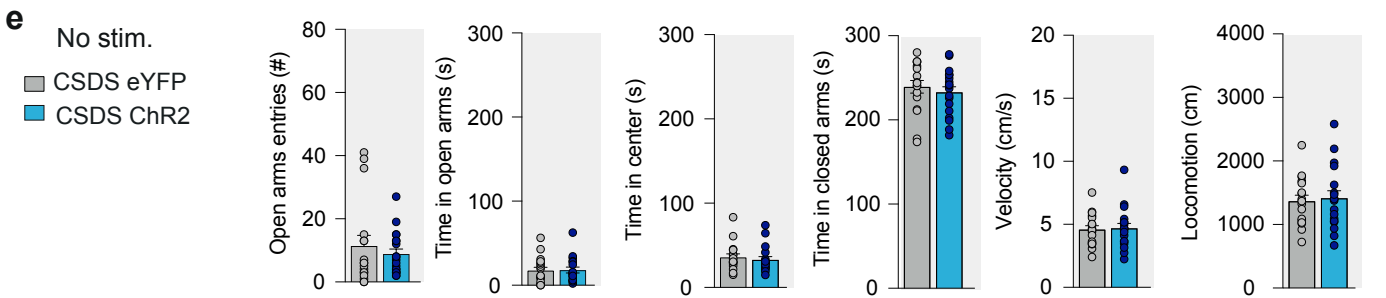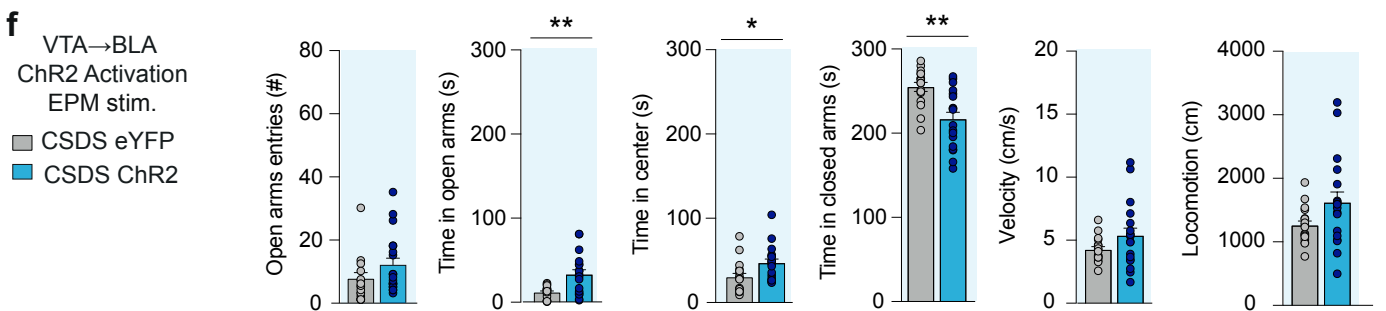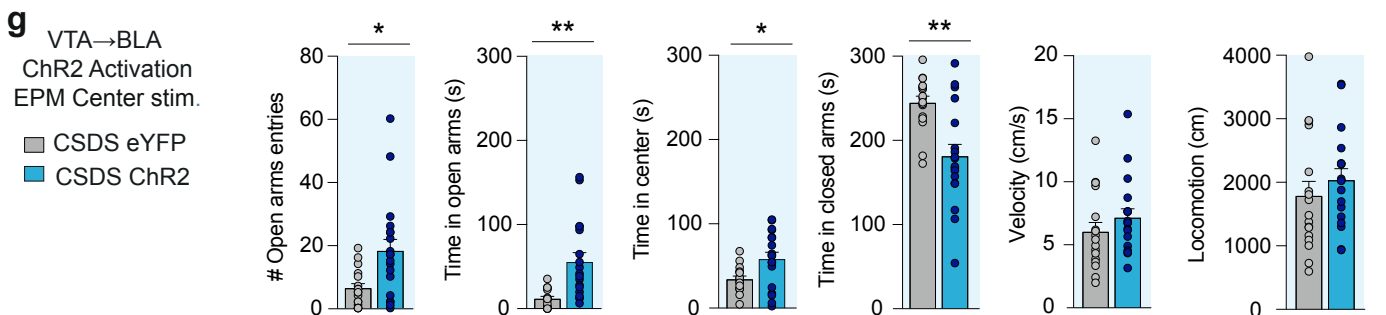

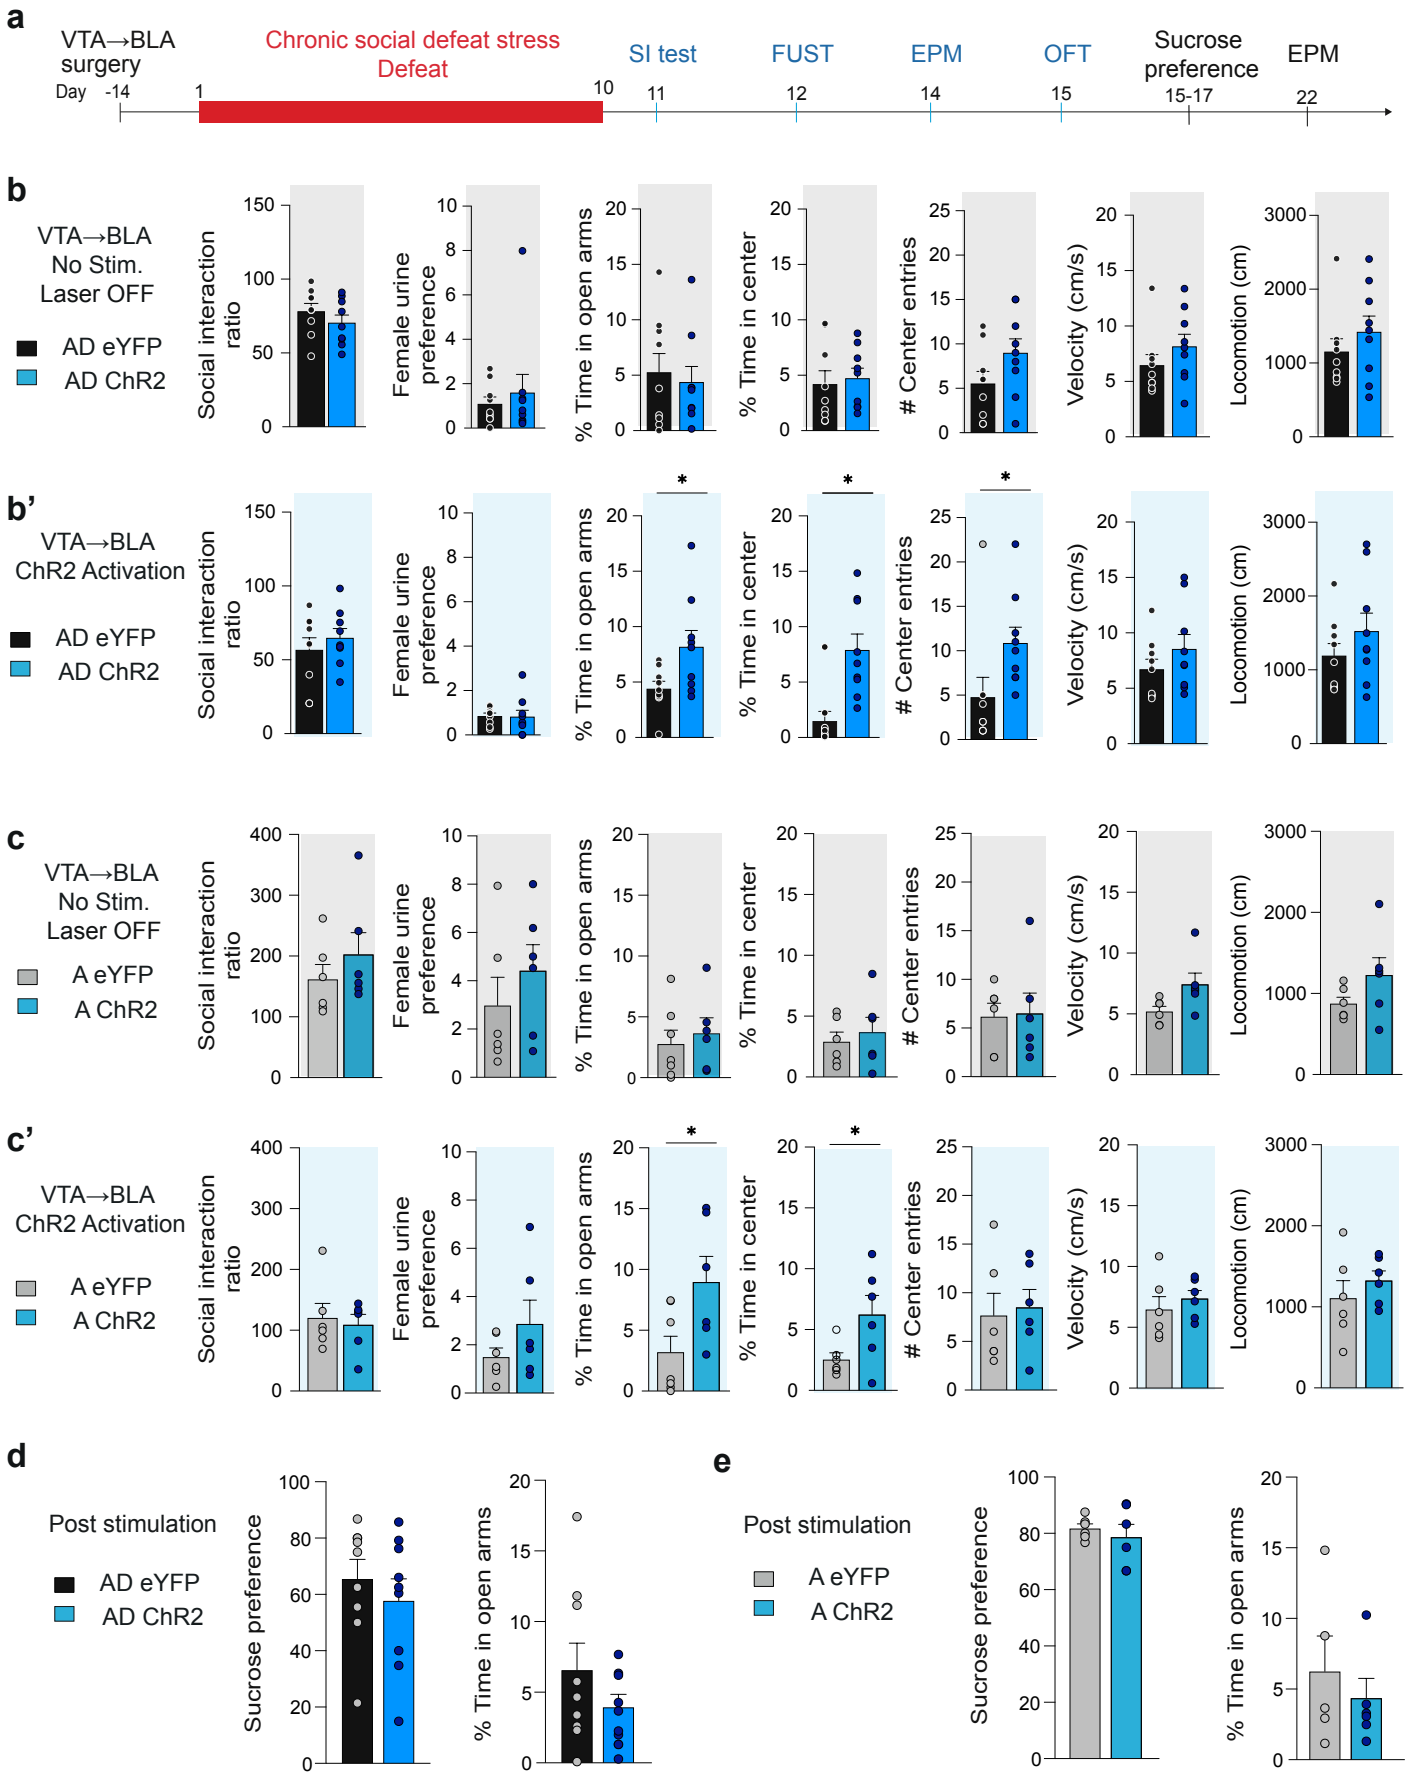

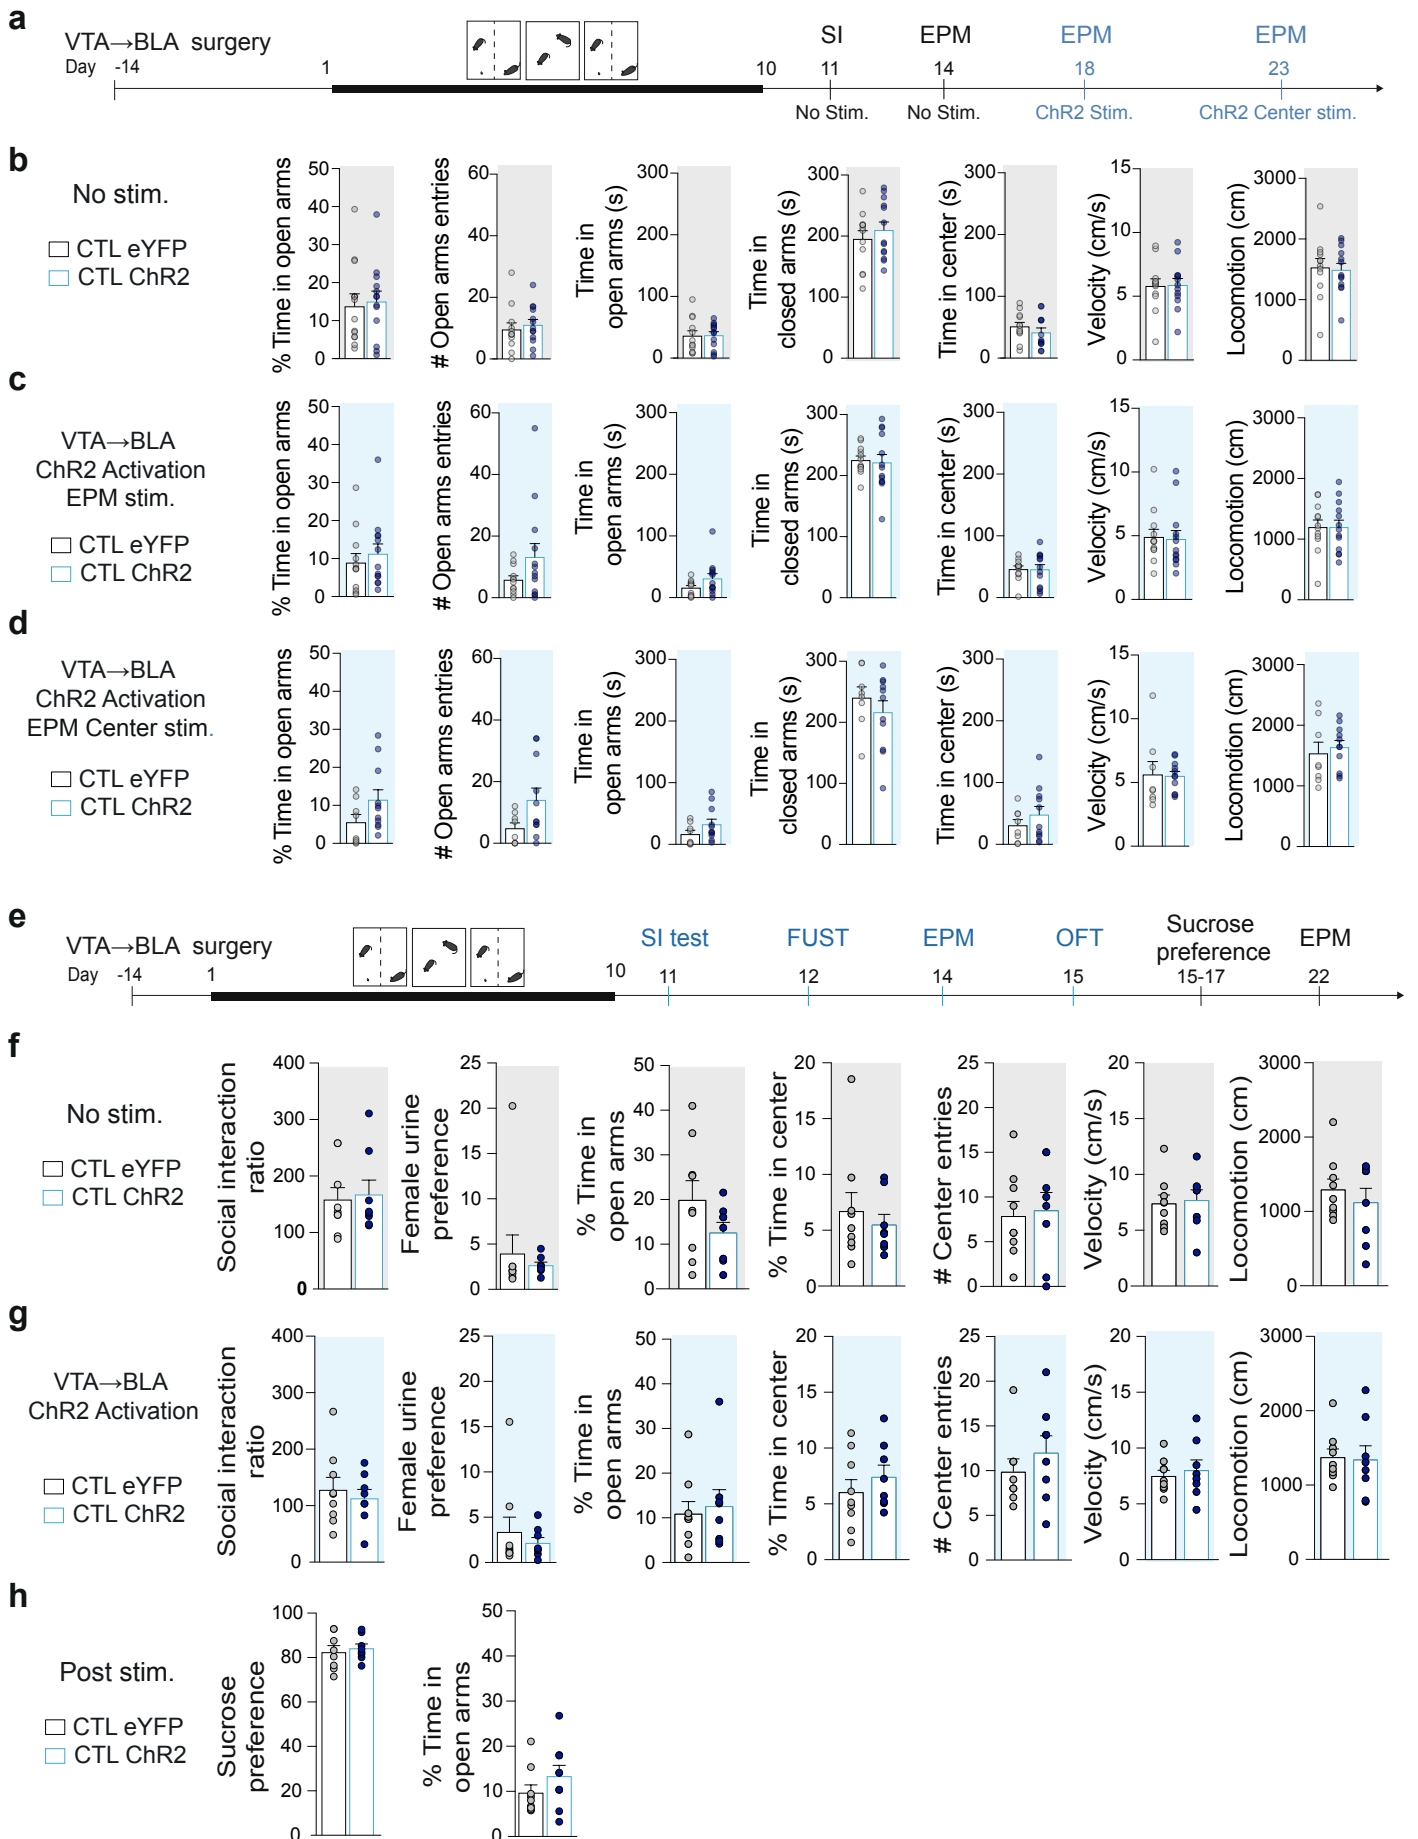

Supplement: 41467_2022_29155_MOESM1_ESM.pdf [file 41467_2022_29155_MOESM1_ESM.pdf]
