# Supplementary material for: Midbrain projection to the basolateral amygdala encodes anxiety-like but not depression-like behaviors
Source: PubMed Central journal article supplement (PMC8940900; doi:10.1038/s41467-022-29155-1), 2022-03-22
Supplement: 41467_2022_29155_MOESM3_ESM.pdf [file 41467_2022_29155_MOESM3_ESM.pdf]

**Midbrain projection to the basolateral amygdala encodes  
anxiety-like but not depression-like behaviors**

**Inventory of Supporting Information: NCOMMS-20-44686B**

**1     Main**

*Title*  
*Author list*  
*Affiliations*  
*Abstract*  
*Introduction*  
*Results*  
*Discussion*  
*Methods*  
*References*  
*Acknowledgments*  
*Author Contributions Statement*  
*Competing Interests Statement*  
*Figure Legends*

**4     Figures**

**15    Supplementary Information**

1    *Supplementary Figure Legends*  
11   *Supplementary Figures*  
2    *Data Source Files*  
1    *Reporting Summary*

**1     Response to Reviewer's comments**

**1     Editorial Policy Checklist**

**1     Author Checklist**
